# Supplementary material
Source: publisher figshare collection journal article supplement (https://gsajournals.figshare.com/ndownloader/files/22699346)
Supplement: Supplementary file 1 [file 22699346]

## Sheet: Sheet1
Table S3. List of the 790 genes or transcripts harbored significant single nucleotide variants in Anopheles sinensis.
No.	Protein ID	Size (bp)	GenBank acc.	Name_CDS	Gene description	Gene name	Classification	No. of mutation	Mutation rate
1	ASIC000263	1623	KFB34813	ASIC000263 AS2_scf7180000687748 CDS join(26952..27158,28821..29064,30337..30717,30785..30923,30995..31373,31439..31711)	AGAP009979-PA-like protein		with AGAP ID	1	0.000616143
2	ASIC000266	1050	KFB34816	ASIC000266 AS2_scf7180000687748 CDS complement(join(63791..64129,65465..66149,66565..66590))	hypothetical protein		hypothetical protein	1	0.000952381
3	ASIC000370	405	KFB34841	ASIC000370 AS2_scf7180000688186 CDS complement(join(30140..30411,31961..32093))	Type IV pilus assembly PilZ		AC2_annotated	2	0.00493827
4	ASIC000387	5337	KFB34847	ASIC000387 AS2_scf7180000688244 CDS join(25899..25950,26013..27275,27355..27540,27607..31442)	AGAP003638-PA-like protein		uncharacterized protein	1	0.000187371
5	ASIC000529	342	KFB34874	ASIC000529 AS2_scf7180000688913 CDS complement(76624..76965)	protein KIAA0664-like protein		AC2_annotated	1	0.00292398
6	ASIC000598	2517	KFB34914	ASIC000598 AS2_scf7180000689180 CDS join(285661..285864,286120..286275,286606..286947,289211..290234,290912..291060,291132..291577,291651..291846)	kinesin heavy chain		AC2_annotated	1	0.000397298
7	ASIC000637	390	KFB34935	ASIC000637 AS2_scf7180000689237 CDS complement(19044..19433)	putative peptidase family M1		AC2_annotated	1	0.0025641
8	ASIC000651	1638	KFB34945	ASIC000651 AS2_scf7180000689293 CDS complement(join(12794..14296,14396..14530))	AGAP003482-PA-like protein		uncharacterized protein	2	0.001221
9	ASIC000721	3279	KFB34963	ASIC000721 AS2_scf7180000689694 CDS complement(join(90872..92839,94985..95206,95568..95659,96099..96958,97029..97097,97162..97229))	hypothetical protein		hypothetical protein	1	0.000304971
10	ASIC000823	4350	KFB35007	ASIC000823 AS2_scf7180000690005 CDS complement(join(273262..273345,273438..273573,273650..273948,274021..274311,274387..274539,274607..274918,274988..275576,275708..275969,276045..276269,276335..278205,278275..278402))	AGAP003187-PA-like protein		with AGAP ID	1	0.000229885
11	ASIC000898	2565	KFB35066	ASIC000898 AS2_scf7180000690046 CDS join(9693..11452,11637..12146,12341..12635)	hypothetical protein		hypothetical protein	1	0.000389864
12	ASIC000955	2241	KFB35086	ASIC000955 AS2_scf7180000690255 CDS join(124527..124731,124816..124953,129770..129913,132237..132390,137168..137470,139881..140297,143533..144412)	AGAP005329-PA-like protein		uncharacterized protein	2	0.000892459
13	ASIC000956	1866	KFB35087	ASIC000956 AS2_scf7180000690255 CDS join(160921..161047,168990..169614,171135..172248)	AGAP005328-PA-like protein		uncharacterized protein	1	0.000535906
14	ASIC000958	2688	KFB35089	ASIC000958 AS2_scf7180000690255 CDS complement(join(175502..176724,176789..178253))	AGAP005326-PA-like protein		uncharacterized protein	1	0.000372024
15	ASIC001041	2190	KFB35135	ASIC001041 AS2_scf7180000690428 CDS join(81001..81318,81398..81512,81795..81851,81926..82072,82141..82278,82894..83128,83213..83291,83366..83575,83642..83788,83856..84009,84115..84264,84332..84388,85273..85467,85532..85621,85688..85785)	AGAP006463-PA-like protein		uncharacterized protein	1	0.000456621
16	ASIC001047	963	KFB35140	ASIC001047 AS2_scf7180000690428 CDS 113749..114711	hypothetical protein		hypothetical protein	2	0.00207684
17	ASIC001177	1464	KFB54038	ASIC001177 AS2_scf7180000690756 CDS 475..1938	gag-like protein		AC2_annotated	3	0.00204918
18	ASIC001190	894	KFB35194	ASIC001190 AS2_scf7180000690781 CDS complement(join(165891..166448,166519..166809,167028..167072))	AGAP011792-PA-like protein	CLIPA7	Immunity	1	0.00111857
19	ASIC001413	726	KFB35248	ASIC001413 AS2_scf7180000691519 CDS join(32755..33237,33503..33745)	hypothetical protein		hypothetical protein	2	0.00275482
20	ASIC001453	459	KFB35259	ASIC001453 AS2_scf7180000691554 CDS complement(join(25509..25919,25997..26044))	AGAP007830-PA-like protein		uncharacterized protein	1	0.00217865
21	ASIC001509	2037	KFB35294	ASIC001509 AS2_scf7180000691739 CDS complement(join(149266..150195,150268..151218,154900..155055))	AGAP008515-PA-like protein		uncharacterized protein	1	0.000490918
22	ASIC001836	1110	KFB35349	ASIC001836 AS2_scf7180000693062 CDS join(23819..24847,24920..25000)	AGAP002540-PA-like protein		uncharacterized protein	1	0.000900901
23	ASIC001875	1527	KFB35364	ASIC001875 AS2_scf7180000693150 CDS complement(join(56141..57419,57471..57634,57711..57794))	AGAP003059-PC-like protein		uncharacterized protein	1	0.000654879
24	ASIC001887	246	KFB35371	ASIC001887 AS2_scf7180000693169 CDS 27004..27249	saccharopine dehydrogenase		AC2_annotated	1	0.00406504
25	ASIC001969	183	KFB35388	ASIC001969 AS2_scf7180000693473 CDS join(42664..42729,43134..43250)	short-chain dehydrogenase		AC2_annotated	1	0.00546448
26	ASIC002022	4878	KFB35396	ASIC002022 AS2_scf7180000693723 CDS complement(join(26443..26477,26828..27590,27617..28114,28191..29576,29618..30280,30465..30588,30722..31998,32166..32297))	AGAP003803-PA-like protein		with AGAP ID	1	0.000205002
27	ASIC002030	705	KFB35400	ASIC002030 AS2_scf7180000693753 CDS join(20999..21043,21124..21783)	hypothetical protein		hypothetical protein	1	0.00141844
28	ASIC002138	3057	KFB35440	ASIC002138 AS2_scf7180000694094 CDS complement(join(31721..32001,32085..32519,32589..32868,33264..33638,33996..34228,34281..34623,34690..35190,35257..35843,35922..35943))	AGAP003906-PA-like protein		uncharacterized protein	1	0.000327118
29	ASIC002160	6246	KFB35454	ASIC002160 AS2_scf7180000694122 CDS join(9821..10271,10371..11165,11223..12191,12266..12422,12783..13624,13693..14539,14568..16249,16313..16815)	AGAP003610-PA-like protein		uncharacterized protein	1	0.000160102
30	ASIC002278	3021	KFB35511	ASIC002278 AS2_scf7180000694399 CDS join(88499..88728,88915..90361,90447..90867,90911..91368,91438..91609,91700..91992)	AGAP003345-PA-like protein		with AGAP ID	1	0.000331016
31	ASIC002332	1683	KFB35538	ASIC002332 AS2_scf7180000694553 CDS complement(join(78052..78191,78271..79813))	AGAP003001-PA-like protein		with AGAP ID	1	0.000594177
32	ASIC002394	294	KFB35556	ASIC002394 AS2_scf7180000694833 CDS 93401..93694	hypothetical protein		hypothetical protein	1	0.00340136
33	ASIC002397	282	KFB35559	ASIC002397 AS2_scf7180000694833 CDS 103044..103325	AGAP007190-PA-like protein		uncharacterized protein	1	0.0035461
34	ASIC002400	162	KFB35562	ASIC002400 AS2_scf7180000694833 CDS complement(142156..142317)	hypothetical protein		hypothetical protein	1	0.00617284
35	ASIC002411	1104	KFB35549	ASIC002411 AS2_scf7180000694833 CDS complement(join(31995..33084,33273..33286))	hypothetical protein		hypothetical protein	2	0.00181159
36	ASIC002417	3954	KFB35570	ASIC002417 AS2_scf7180000694837 CDS complement(join(30330..32009,32039..33403,33603..34293,34520..34737))	AGAP001535-PA-like protein		with AGAP ID	1	0.000252908
37	ASIC002418	2751	KFB35571	ASIC002418 AS2_scf7180000694837 CDS join(39117..39213,39277..40014,40081..41996)	AGAP001534-PA-like protein		uncharacterized protein	1	0.000363504
38	ASIC002447	2304	KFB35578	ASIC002447 AS2_scf7180000694908 CDS join(31310..32140,32540..32550,33277..33365,34777..34863,35955..36019,36211..36431,36998..37080,37683..37823,40885..41037,45453..45667,49919..49969,52611..52967)	AGAP005599-PA-like protein		with AGAP ID	1	0.000434028
39	ASIC002461	2142	KFB35616	ASIC002461 AS2_scf7180000694910 CDS complement(join(111965..112358,112440..114062,114131..114231,114300..114323))	AGAP012362-PA-like protein		with AGAP ID	1	0.000466853
40	ASIC002474	8313	KFB35605	ASIC002474 AS2_scf7180000694910 CDS complement(join(14469..14841,14915..14951,15027..15143,15221..15604,15908..16353,19040..19166,20232..21042,21116..22489,24217..26831,28466..30494))	hypothetical protein		hypothetical protein	2	0.000240587
41	ASIC002476	4047	KFB35607	ASIC002476 AS2_scf7180000694910 CDS join(41174..41704,42368..43259,47434..50057)	AGAP011963-PA-like protein		uncharacterized protein	1	0.000247097
42	ASIC002487	2130	KFB35627	ASIC002487 AS2_scf7180000694921 CDS join(6990..8407,8480..9191)	AGAP002309-PA-like protein	WDY_ANOGA	with AGAP ID	2	0.000938967
43	ASIC002616	504	KFB35717	ASIC002616 AS2_scf7180000694985 CDS join(158543..158639,159789..160195)	dynein gamma chain, flagellar outer arm, putative		AC2_annotated	1	0.00198413
44	ASIC002632	1386	KFB35732	ASIC002632 AS2_scf7180000694985 CDS join(271583..272342,272411..273036)	AGAP008684-PA-like protein		with AGAP ID	2	0.001443
45	ASIC002662	1566	KFB35759	ASIC002662 AS2_scf7180000694985 CDS complement(join(560975..561142,561206..561338,561413..561813,561889..561972,562590..562787,562948..563285,563348..563591))	hypothetical protein		hypothetical protein	1	0.00063857
46	ASIC002672	4320	KFB35768	ASIC002672 AS2_scf7180000694985 CDS join(649753..649795,649861..650163,650232..650438,650498..652066,657164..657679,657743..658126,658198..658847,658911..659345,659411..659623)	hypothetical protein		hypothetical protein	1	0.000231481
47	ASIC002694	330	KFB35788	ASIC002694 AS2_scf7180000694995 CDS join(135288..135308,135540..135848)	phospholipase C		AC2_annotated	2	0.00606061
48	ASIC002711	1860	KFB35793	ASIC002711 AS2_scf7180000695001 CDS complement(join(23841..23987,24050..24448,24492..25662,25716..25858))	hypothetical protein		hypothetical protein	2	0.00107527
49	ASIC002752	3462	KFB35824	ASIC002752 AS2_scf7180000695020 CDS join(21886..22099,22613..23403,24904..25533,25604..25837,25955..26101,26176..26940,27007..27094,27169..27341,27959..28378)	AGAP002548-PA-like protein		uncharacterized protein	1	0.00028885
50	ASIC002789	357	KFB54062	ASIC002789 AS2_scf7180000695039 CDS join(8042..8225,8346..8518)	hypothetical protein		hypothetical protein	1	0.00280112
51	ASIC002801	1530	KFB35862	ASIC002801 AS2_scf7180000695044 CDS join(113864..115057,115287..115622)	hypothetical protein		hypothetical protein	1	0.000653595
52	ASIC002803	1152	KFB35864	ASIC002803 AS2_scf7180000695044 CDS complement(join(121154..121377,123147..123578,124292..124633,124701..124854))	hypothetical protein		hypothetical protein	1	0.000868056
53	ASIC002880	525	KFB35925	ASIC002880 AS2_scf7180000695056 CDS join(319318..319497,319750..320085,320152..320160)	hypothetical protein		hypothetical protein	1	0.00190476
54	ASIC002906	756	KFB35948	ASIC002906 AS2_scf7180000695056 CDS join(519194..519731,519815..519956,520023..520098)	AGAP005829-PA-like protein		with AGAP ID	1	0.00132275
55	ASIC002949	2904	KFB35969	ASIC002949 AS2_scf7180000695073 CDS complement(join(4659..5548,5621..5808,5882..6304,6378..6682,6745..6874,6951..7272,7356..7620,7697..8077))	AGAP010451-PA-like protein		with AGAP ID	1	0.000344353
56	ASIC002959	1119	KFB35975	ASIC002959 AS2_scf7180000695074 CDS complement(join(30382..31398,31466..31567))	hypothetical protein		hypothetical protein	1	0.000893655
57	ASIC002991	912	KFB35996	ASIC002991 AS2_scf7180000695082 CDS 157325..158236	nucleoprotein N		AC2_annotated	2	0.00219298
58	ASIC003011	843	KFB36027	ASIC003011 AS2_scf7180000695084 CDS 117645..118487	hypothetical protein		hypothetical protein	1	0.00118624
59	ASIC003096	3069	KFB36066	ASIC003096 AS2_scf7180000695236 CDS join(285289..285342,285418..286006,287290..287905,289079..290888)	AGAP005440-PA-like protein		uncharacterized protein	1	0.000325839
60	ASIC003135	2682	KFB36100	ASIC003135 AS2_scf7180000695236 CDS complement(join(545329..545747,545812..546556,548299..548699,548765..549881))	hypothetical protein	CYP6P3	hypothetical protein	1	0.000372856
61	ASIC003227	870	KFB36164	ASIC003227 AS2_scf7180000695300 CDS 4171..5040	putative nucleic acid binding protein		AC2_annotated	1	0.00114943
62	ASIC003247	2262	KFB36177	ASIC003247 AS2_scf7180000695331 CDS complement(join(27402..27549,27629..27638,33192..33715,33789..33989,34073..34411,34578..35118,35251..35469,35538..35691,35838..35963))	AGAP003566-PA-like protein		uncharacterized protein	1	0.000442087
63	ASIC003262	312	KFB36179	ASIC003262 AS2_scf7180000695349 CDS 14106..14417	putative transmembrane protein		AC2_annotated	1	0.00320513
64	ASIC003328	1854	KFB36217	ASIC003328 AS2_scf7180000695450 CDS join(36574..36592,36763..36893,36972..38089,38190..38529,38603..38848)	AGAP002800-PA-like protein		with AGAP ID	2	0.00107875
65	ASIC003351	543	KFB36238	ASIC003351 AS2_scf7180000695471 CDS 114880..115422	hypothetical protein		hypothetical protein	1	0.00184162
66	ASIC003417	1305	KFB36296	ASIC003417 AS2_scf7180000695473 CDS join(478059..478120,478229..478424,478480..479155,479229..479503,479584..479679)	thioester-containing protein 1	TEP11	Immunity	1	0.000766284
67	ASIC003441	681	KFB36318	ASIC003441 AS2_scf7180000695475 CDS complement(66552..67232)	hypothetical protein		hypothetical protein	1	0.00146843
68	ASIC003453	1290	KFB36329	ASIC003453 AS2_scf7180000695475 CDS join(147477..147505,147562..147793,147854..148002,148069..148370,148485..148641,148709..148913,148969..149057,149128..149200,149273..149326)	AGAP008333-PA-like protein	Or9	odorant protein	2	0.00155039
69	ASIC003471	1503	KFB36313	ASIC003471 AS2_scf7180000695475 CDS complement(join(37899..38066,38146..38975,39043..39200,39269..39366,39528..39776))	AGAP004972-PA-like protein		with AGAP ID	1	0.000665336
70	ASIC003486	4575	KFB36448	ASIC003486 AS2_scf7180000695476 CDS join(791235..791665,791825..792311,793072..796728)	AGAP004302-PA-like protein		uncharacterized protein	1	0.000218579
71	ASIC003511	3111	KFB36471	ASIC003511 AS2_scf7180000695476 CDS join(1076526..1076788,1076863..1076979,1077049..1079075,1079151..1079389,1079449..1079902,1080051..1080061)	AGAP004062-PA-like protein		with AGAP ID	2	0.00064288
72	ASIC003518	2502	KFB36358	ASIC003518 AS2_scf7180000695476 CDS join(131786..131890,131966..133826,133859..134394)	AGAP003842-PA-like protein		with AGAP ID	1	0.00039968
73	ASIC003548	417	KFB36385	ASIC003548 AS2_scf7180000695476 CDS complement(join(304347..304707,304836..304891))	hypothetical protein		hypothetical protein	1	0.00239808
74	ASIC003556	3927	KFB36392	ASIC003556 AS2_scf7180000695476 CDS join(343344..343412,343483..344258,344326..347407)	AGAP003676-PA-like protein		with AGAP ID	1	0.000254647
75	ASIC003580	537	KFB36413	ASIC003580 AS2_scf7180000695476 CDS 577254..577790	uncharacterized protein At4g22160-like protein		uncharacterized protein	1	0.0018622
76	ASIC003599	990	KFB36430	ASIC003599 AS2_scf7180000695476 CDS 686351..687340	AGAP004295-PA-like protein		with AGAP ID	1	0.0010101
77	ASIC003617	5448	KFB36487	ASIC003617 AS2_scf7180000695478 CDS join(180587..181028,182193..182283,198764..198964,201408..201621,203161..207660)	AGAP006403-PA-like protein		with AGAP ID	1	0.000183554
78	ASIC003639	630	KFB36499	ASIC003639 AS2_scf7180000695479 CDS complement(join(39145..39529,39588..39711,39874..39994))	hypothetical protein		hypothetical protein	1	0.0015873
79	ASIC003670	471	KFB36533	ASIC003670 AS2_scf7180000695482 CDS complement(join(192107..192381,192650..192845))	extracellular subtilisin-like serine proteinase precursor		AC2_annotated	1	0.00212314
80	ASIC003679	13461	KFB36534	ASIC003679 AS2_scf7180000695483 CDS join(421..3586,3877..8988,9995..10087,10162..12948,13019..13160,13238..14565,14969..15310,15446..15751,15818..16002)	hypothetical protein		hypothetical protein	1	7.42887e-05
81	ASIC003704	270	KFB36648	ASIC003704 AS2_scf7180000695483 CDS complement(join(686225..686386,687609..687716))	hypothetical protein		hypothetical protein	1	0.0037037
82	ASIC003791	492	KFB36595	ASIC003791 AS2_scf7180000695483 CDS complement(join(356648..357066,357142..357214))	putative L-carnitine dehydratase/alpha-methylacyl-CoA racemase		AC2_annotated	1	0.00203252
83	ASIC003832	222	KFB36685	ASIC003832 AS2_scf7180000695484 CDS 217286..217507	19.5g1 protein		AC2_annotated	1	0.0045045
84	ASIC003870	702	KFB36719	ASIC003870 AS2_scf7180000695485 CDS 327489..328190	AGAP008579-PA-like protein		uncharacterized protein	1	0.0014245
85	ASIC003907	408	KFB36839	ASIC003907 AS2_scf7180000695491 CDS complement(712783..713190)	ferredoxin		AC2_annotated	1	0.00245098
86	ASIC003920	1080	KFB36762	ASIC003920 AS2_scf7180000695491 CDS complement(join(141973..142319,142397..142580,142656..143125,143596..143674))	AGAP000315-PA-like protein	CLIPC6	with AGAP ID	1	0.000925926
87	ASIC003949	3897	KFB36789	ASIC003949 AS2_scf7180000695491 CDS complement(join(288386..288770,288861..289185,289258..289418,289504..289798,290000..292143,292208..292367,292451..292752,305880..306004))	WW domain-containing protein 1	KIBRLG	AC2_annotated	1	0.000256608
88	ASIC003956	552	KFB36795	ASIC003956 AS2_scf7180000695491 CDS complement(334342..334893)	AGC family protein kinase		AC2_annotated	1	0.00181159
89	ASIC003974	3213	KFB36811	ASIC003974 AS2_scf7180000695491 CDS join(450208..450250,451051..451165,453806..455991,456274..456672,456757..457178,457244..457291)	saposin		AC2_annotated	1	0.000311236
90	ASIC004060	366	KFB36892	ASIC004060 AS2_scf7180000695504 CDS join(159982..160038,160275..160583)	dNA replication and repair protein RecF		AC2_annotated	1	0.00273224
91	ASIC004075	1053	KFB36905	ASIC004075 AS2_scf7180000695504 CDS join(243527..244202,244279..244655)	AGAP002062-PA-like protein		with AGAP ID	1	0.000949668
92	ASIC004081	3183	KFB36911	ASIC004081 AS2_scf7180000695504 CDS complement(join(267924..268463,268526..268804,268872..269218,269274..269378,269445..269609,269683..269897,272069..272606,272678..273064,273368..273532,273605..273819,274077..274234,274330..274398))	hypothetical protein		hypothetical protein	1	0.000314169
93	ASIC004087	2874	KFB36916	ASIC004087 AS2_scf7180000695504 CDS complement(join(304973..306384,307078..307323,307816..308349,309053..309208,310036..310252,314096..314280,314365..314488))	AGAP002052-PA-like protein		uncharacterized protein	1	0.000347947
94	ASIC004108	738	KFB36935	ASIC004108 AS2_scf7180000695504 CDS complement(join(435047..435677,435704..435810))	hypothetical protein		hypothetical protein	1	0.00135501
95	ASIC004130	3279	KFB36954	ASIC004130 AS2_scf7180000695505 CDS complement(join(27600..27776,27842..28048,28121..28766,28836..29034,29729..29931,30003..30937,31003..31136,31203..31926,32319..32372))	AGAP001694-PA-like protein		with AGAP ID	2	0.000609942
96	ASIC004186	540	KFB37010	ASIC004186 AS2_scf7180000695510 CDS join(174261..174467,175248..175481,175570..175668)	AGAP002790-PA-like protein		with AGAP ID	1	0.00185185
97	ASIC004205	411	KFB37019	ASIC004205 AS2_scf7180000695513 CDS 19272..19682	Protein Y67D8C.2		AC2_annotated	1	0.00243309
98	ASIC004223	1086	KFB37029	ASIC004223 AS2_scf7180000695516 CDS complement(join(69620..69775,69848..70017,70097..70268,70634..70713,70784..70998,71149..71441))	AGAP003962-PA-like protein		with AGAP ID	1	0.00092081
99	ASIC004261	1236	KFB37064	ASIC004261 AS2_scf7180000695524 CDS join(34923..35168,35631..35863,35935..36070,36140..36267,36407..36746,36822..36911,36970..37032)	hypothetical protein		hypothetical protein	4	0.00323625
100	ASIC004285	600	KFB37091	ASIC004285 AS2_scf7180000695527 CDS complement(join(113559..113902,114270..114505,114747..114766))	uncharacterized protein LOC100811170 precursor		uncharacterized protein	1	0.00166667
101	ASIC004290	639	KFB37083	ASIC004290 AS2_scf7180000695527 CDS join(35545..36094,36153..36241)	hypothetical protein		hypothetical protein	1	0.00156495
102	ASIC004315	1887	KFB37098	ASIC004315 AS2_scf7180000695534 CDS 17102..18988	AGAP012979-PA-like protein		with AGAP ID	1	0.000529942
103	ASIC004369	450	KFB37162	ASIC004369 AS2_scf7180000695538 CDS complement(218826..219275)	hypothetical protein		hypothetical protein	1	0.00222222
104	ASIC004389	828	KFB37180	ASIC004389 AS2_scf7180000695540 CDS join(39766..40565,40826..40853)	AGAP001648-PA-like protein	CLIPB17	Immunity	1	0.00120773
105	ASIC004420	219	KFB37209	ASIC004420 AS2_scf7180000695541 CDS 202311..202529	hypothetical protein		hypothetical protein	1	0.00456621
106	ASIC004453	3081	KFB37238	ASIC004453 AS2_scf7180000695541 CDS complement(join(585674..586016,586085..586197,586280..588747,588880..588985,589106..589156))	AGAP000343-PA-like protein		uncharacterized protein	1	0.00032457
107	ASIC004487	633	KFB37267	ASIC004487 AS2_scf7180000695541 CDS complement(810702..811334)	hypothetical protein		hypothetical protein	1	0.00157978
108	ASIC004488	1092	KFB37268	ASIC004488 AS2_scf7180000695541 CDS complement(812723..813814)	hypothetical protein		hypothetical protein	3	0.00274725
109	ASIC004496	306	KFB37275	ASIC004496 AS2_scf7180000695541 CDS complement(join(833037..833310,833365..833396))	cysteine desulfurase		AC2_annotated	1	0.00326797
110	ASIC004497	441	KFB37276	ASIC004497 AS2_scf7180000695541 CDS complement(834511..834951)	hypothetical protein		hypothetical protein	1	0.00226757
111	ASIC004506	648	KFB37289	ASIC004506 AS2_scf7180000695543 CDS join(93693..93759,93878..94458)	hypothetical protein		hypothetical protein	1	0.00154321
112	ASIC004511	2817	KFB37294	ASIC004511 AS2_scf7180000695543 CDS complement(join(141804..142167,142199..142296,161529..161723,161787..163417,163481..163801,163870..164059,164134..164151))	AGAP009676-PA-like protein		with AGAP ID	1	0.000354988
113	ASIC004517	273	KFB37299	ASIC004517 AS2_scf7180000695543 CDS complement(186223..186495)	hypothetical protein		hypothetical protein	1	0.003663
114	ASIC004524	351	KFB37282	ASIC004524 AS2_scf7180000695543 CDS 27975..28325	RND transporter		AC2_annotated	1	0.002849
115	ASIC004540	2709	KFB37409	ASIC004540 AS2_scf7180000695544 CDS complement(join(807464..807667,807737..808534,808794..809483,809559..810575))	AGAP002004-PA-like protein		with AGAP ID	1	0.00036914
116	ASIC004562	768	KFB37429	ASIC004562 AS2_scf7180000695544 CDS complement(995276..996043)	AGAP001989-PA-like protein		uncharacterized protein	1	0.00130208
117	ASIC004566	264	KFB37432	ASIC004566 AS2_scf7180000695544 CDS 1029511..1029774	glycosyl hydrolase family protein		AC2_annotated	1	0.00378788
118	ASIC004581	183	KFB37446	ASIC004581 AS2_scf7180000695544 CDS 1115217..1115399	hypothetical protein		hypothetical protein	1	0.00546448
119	ASIC004614	267	KFB37323	ASIC004614 AS2_scf7180000695544 CDS join(90799..90848,90892..91108)	RNA-directed DNA polymerase from mobile element jockey-like protein		AC2_annotated	1	0.00374532
120	ASIC004649	1365	KFB37354	ASIC004649 AS2_scf7180000695544 CDS join(303651..303779,303856..304057,304136..305169)	AGAP002022-PA-like protein		with AGAP ID	2	0.0014652
121	ASIC004663	2571	KFB37367	ASIC004663 AS2_scf7180000695544 CDS join(381107..382886,382957..383450,383524..383820)	hypothetical protein		hypothetical protein	1	0.000388954
122	ASIC004676	12855	KFB37379	ASIC004676 AS2_scf7180000695544 CDS complement(join(414717..415019,415354..415977,416046..416385,416445..418976,419044..419173,419241..421983,422049..422253,422325..422878,422952..424241,424307..425527,425607..425872,425932..426116,426185..427146,427212..427935,428019..428119,428182..428726,428789..428918))	AGAP002009-PA-like protein		with AGAP ID	1	7.77907e-05
123	ASIC004810	1953	KFB37573	ASIC004810 AS2_scf7180000695549 CDS complement(join(490909..491934,492021..492434,493658..494170))	AGAP011347-PA-like protein		with AGAP ID	1	0.000512033
124	ASIC004861	1647	KFB37624	ASIC004861 AS2_scf7180000695551 CDS complement(join(96151..96478,96579..96747,96934..97137,97307..97564,98099..98786))	AGAP007795-PA-like protein		uncharacterized protein	2	0.00121433
125	ASIC004980	1758	KFB37813	ASIC004980 AS2_scf7180000695556 CDS complement(join(1378788..1379397,1379491..1380186,1380254..1380705))	AGAP012047-PA-like protein		with AGAP ID	1	0.000568828
126	ASIC004994	639	KFB37825	ASIC004994 AS2_scf7180000695556 CDS complement(join(1426803..1426967,1426997..1427417,1427693..1427745))	hypothetical protein		hypothetical protein	1	0.00156495
127	ASIC005053	4713	KFB37740	ASIC005053 AS2_scf7180000695556 CDS join(774029..777502,777573..777714,777772..778188,778259..778532,778598..779003)	hypothetical protein		hypothetical protein	1	0.000212179
128	ASIC005092	234	KFB37776	ASIC005092 AS2_scf7180000695556 CDS 1109153..1109386	hypothetical protein		hypothetical protein	1	0.0042735
129	ASIC005172	405	KFB37857	ASIC005172 AS2_scf7180000695557 CDS join(119438..119458,119869..120005,120373..120571,120640..120687)	AGAP000940-PA-like protein	CTL7	Immunity	1	0.00246914
130	ASIC005277	270	KFB38001	ASIC005277 AS2_scf7180000695561 CDS 85103..85372	hypothetical protein		hypothetical protein	2	0.00740741
131	ASIC005299	6681	KFB38031	ASIC005299 AS2_scf7180000695562 CDS complement(join(191519..195297,197126..197257,197328..197381,197893..198021,198156..198427,200253..200571,200678..200852,202477..202581,202729..203228,203433..203729,203878..204349,204504..204747,216205..216407))	hypothetical protein		hypothetical protein	1	0.000149678
132	ASIC005384	816	KFB38108	ASIC005384 AS2_scf7180000695569 CDS join(654617..654735,654825..655521)	NIF3-like protein 1, putative		AC2_annotated	1	0.00122549
133	ASIC005401	3276	KFB38126	ASIC005401 AS2_scf7180000695570 CDS join(82307..82488,82592..82982,83063..83647,83735..83820,83885..84351,84442..84569,85026..85162,85235..85519,85588..85807,85881..86675)	AGAP010315-PA-like protein		with AGAP ID	1	0.00030525
134	ASIC005405	2985	KFB38130	ASIC005405 AS2_scf7180000695570 CDS complement(join(121225..124194,124261..124275))	hypothetical protein		hypothetical protein	1	0.000335008
135	ASIC005444	306	KFB38150	ASIC005444 AS2_scf7180000695581 CDS complement(61422..61727)	hypothetical protein		hypothetical protein	1	0.00326797
136	ASIC005494	837	KFB38183	ASIC005494 AS2_scf7180000695604 CDS complement(join(47577..47981,48476..48907))	hypothetical protein		hypothetical protein	1	0.00119474
137	ASIC005503	1800	KFB38175	ASIC005503 AS2_scf7180000695604 CDS 10609..12408	AGAP003453-PA-like protein		uncharacterized protein	1	0.000555556
138	ASIC005515	960	KFB38202	ASIC005515 AS2_scf7180000695608 CDS complement(join(46667..47568,47640..47697))	hypothetical protein		hypothetical protein	1	0.00104167
139	ASIC005528	447	KFB38214	ASIC005528 AS2_scf7180000695608 CDS 104017..104463	l-threonine synthase		AC2_annotated	2	0.00447427
140	ASIC005538	3330	KFB38223	ASIC005538 AS2_scf7180000695608 CDS join(146434..149019,149092..149195,149266..149905)	AGAP013088-PA-like protein		uncharacterized protein	1	0.0003003
141	ASIC005565	2178	KFB38246	ASIC005565 AS2_scf7180000695611 CDS complement(join(181812..181976,182373..184349,185008..185043))	hypothetical protein		hypothetical protein	1	0.000459137
142	ASIC005598	3162	KFB38244	ASIC005598 AS2_scf7180000695611 CDS complement(join(172706..172801,173139..174095,174250..174493,175089..175396,175479..175652,176207..177589))	hypothetical protein		hypothetical protein	1	0.000316256
143	ASIC005601	723	KFB38272	ASIC005601 AS2_scf7180000695616 CDS complement(join(9902..10367,10562..10818))	polyprotein		AC2_annotated	1	0.00138313
144	ASIC005692	1101	KFB38339	ASIC005692 AS2_scf7180000695648 CDS complement(80887..81987)	hypothetical protein		hypothetical protein	1	0.000908265
145	ASIC005722	300	KFB38367	ASIC005722 AS2_scf7180000695648 CDS 471656..471955	hypothetical protein		hypothetical protein	1	0.00333333
146	ASIC005735	10185	KFB38381	ASIC005735 AS2_scf7180000695649 CDS join(142478..142520,143067..143285,147876..148313,148752..148860,150995..151305,151714..151861,156087..156193,156260..156589,156668..157033,158054..158517,159265..159549,159615..159902,159963..160049,160149..160214,160517..160561,161213..161254,161333..161422,161503..161582,161661..161809,162041..166712,166837..166961,167027..167139,168583..168704,168772..16892…	hypothetical protein		hypothetical protein	4	0.000392734
147	ASIC005767	1959	KFB38407	ASIC005767 AS2_scf7180000695652 CDS complement(join(223432..223449,223903..225251,225863..226163,227245..227535))	hypothetical protein		hypothetical protein	1	0.000510465
148	ASIC005791	216	KFB38428	ASIC005791 AS2_scf7180000695652 CDS complement(387995..388210)	long-chain-fatty-acid--CoA ligase		AC2_annotated	1	0.00462963
149	ASIC005855	822	KFB38456	ASIC005855 AS2_scf7180000695653 CDS complement(join(178128..178162,178586..179081,179159..179272,179647..179823))	AGAP011225-PA-like protein		Immunity	1	0.00121655
150	ASIC005876	357	KFB38473	ASIC005876 AS2_scf7180000695653 CDS complement(326398..326754)	aldose 1-epimerase		AC2_annotated	2	0.00560224
151	ASIC005883	363	KFB38479	ASIC005883 AS2_scf7180000695653 CDS complement(355092..355454)	hypothetical protein		hypothetical protein	1	0.00275482
152	ASIC005884	156	KFB38480	ASIC005884 AS2_scf7180000695653 CDS complement(357188..357343)	transposase		AC2_annotated	1	0.00641026
153	ASIC005889	1902	KFB38484	ASIC005889 AS2_scf7180000695653 CDS complement(join(372528..372741,372855..372940,373012..373218,373306..373750,373839..374009,374079..374212,374278..374601,374733..375053))	AGAP009014-PA-like protein	IR31a	with AGAP ID	1	0.000525762
154	ASIC005890	282	KFB38485	ASIC005890 AS2_scf7180000695653 CDS join(376250..376374,376426..376582)	kelch-domain-containing protein		AC2_annotated	1	0.0035461
155	ASIC005894	552	KFB38489	ASIC005894 AS2_scf7180000695653 CDS complement(386391..386942)	hypothetical protein		hypothetical protein	2	0.00362319
156	ASIC005912	7170	KFB38505	ASIC005912 AS2_scf7180000695653 CDS complement(join(450280..451675,451743..452353,452422..453419,453487..453766,453831..454016,454087..457043,457108..457616,457697..457905,458008..458031))	AGAP009022-PA-like protein		with AGAP ID	1	0.00013947
157	ASIC005914	1437	KFB38507	ASIC005914 AS2_scf7180000695653 CDS complement(join(463001..463617,463680..464072,464145..464412,464471..464566,464625..464687))	AGAP009023-PA-like protein		with AGAP ID	1	0.000695894
158	ASIC005935	2961	KFB38526	ASIC005935 AS2_scf7180000695653 CDS join(640633..642655,642724..643661)	AGAP009027-PA-like protein		with AGAP ID	1	0.000337724
159	ASIC005939	411	KFB38530	ASIC005939 AS2_scf7180000695653 CDS complement(652604..653014)	hypothetical protein		hypothetical protein	1	0.00243309
160	ASIC005945	294	KFB38571	ASIC005945 AS2_scf7180000695654 CDS complement(join(57670..57836,58154..58280))	diguanylate cyclase/phosphodiesterase		AC2_annotated	1	0.00340136
161	ASIC005947	165	KFB38573	ASIC005947 AS2_scf7180000695654 CDS complement(84036..84200)	Rapamycin-insensitive companion of mTOR		AC2_annotated	2	0.0121212
162	ASIC005970	1995	KFB38594	ASIC005970 AS2_scf7180000695661 CDS complement(join(28217..28329,28624..28763,28837..29670,29741..30071,30154..30440,30991..31280))	AGAP010549-PA-like protein		with AGAP ID	1	0.000501253
163	ASIC005991	3699	KFB38612	ASIC005991 AS2_scf7180000695661 CDS 145519..149217	AGAP010571-PA-like protein		uncharacterized protein	1	0.000270343
164	ASIC006017	267	KFB38630	ASIC006017 AS2_scf7180000695665 CDS 53085..53351	hypothetical protein		hypothetical protein	1	0.00374532
165	ASIC006055	1779	KFB38662	ASIC006055 AS2_scf7180000695676 CDS complement(113267..115045)	hypothetical protein		hypothetical protein	1	0.000562114
166	ASIC006075	4413	KFB38680	ASIC006075 AS2_scf7180000695676 CDS complement(join(217586..219388,220612..220802,221016..221867,221964..222820,222926..223084,238117..238608,238858..238916))	AGAP008473-PA-like protein		uncharacterized protein	1	0.000226603
167	ASIC006095	3807	KFB38695	ASIC006095 AS2_scf7180000695676 CDS complement(392821..396627)	hypothetical protein		hypothetical protein	3	0.000788022
168	ASIC006096	1902	KFB38696	ASIC006096 AS2_scf7180000695676 CDS join(405590..405725,405967..407396,407472..407807)	AGAP008487-PA-like protein		uncharacterized protein	1	0.000525762
169	ASIC006180	1179	KFB38780	ASIC006180 AS2_scf7180000695679 CDS complement(join(125213..125302,125371..125478,125548..125686,125830..126113,126180..126683,126857..126910))	AGAP004226-PA-like protein		uncharacterized protein	1	0.000848176
170	ASIC006192	345	KFB38879	ASIC006192 AS2_scf7180000695680 CDS 938543..938887	granule-bound starch synthase		AC2_annotated	1	0.00289855
171	ASIC006212	1038	KFB38896	ASIC006212 AS2_scf7180000695680 CDS join(1194939..1194965,1195036..1195143,1195207..1196109)	hypothetical protein		hypothetical protein	1	0.000963391
172	ASIC006226	6366	KFB38907	ASIC006226 AS2_scf7180000695680 CDS complement(join(1288775..1289281,1289711..1292586,1292690..1292853,1292934..1293283,1293355..1293563,1293654..1294084,1294502..1295709,1295941..1295995,1296838..1297271,1297781..1297912))	AGAP013275-PA-like protein		uncharacterized protein	1	0.000157085
173	ASIC006277	339	KFB38952	ASIC006277 AS2_scf7180000695680 CDS complement(1713151..1713489)	thioredoxin reductase		AC2_annotated	2	0.00589971
174	ASIC006402	6774	KFB39078	ASIC006402 AS2_scf7180000695681 CDS complement(join(871814..873167,873269..873930,873999..874321,875831..876020,876085..876466,876534..877901,878107..879603,879695..880356,880425..880760))	hypothetical protein		hypothetical protein	1	0.000147623
175	ASIC006404	4251	KFB39080	ASIC006404 AS2_scf7180000695681 CDS complement(join(889648..893062,893261..893784,893971..894258,894344..894367))	AGAP008436-PA-like protein	ABCC11	Detoxification	1	0.000235239
176	ASIC006420	798	KFB39094	ASIC006420 AS2_scf7180000695681 CDS complement(994708..995505)	Dwil\GK21266-PA-like protein		AC2_annotated	1	0.00125313
177	ASIC006445	6189	KFB39117	ASIC006445 AS2_scf7180000695681 CDS join(1108355..1108453,1108743..1112914,1112978..1113357,1113426..1114441,1114519..1114716,1114779..1114922,1114996..1115175)	AGAP009239-PA-like protein		with AGAP ID	2	0.000323154
178	ASIC006446	2844	KFB39118	ASIC006446 AS2_scf7180000695681 CDS complement(join(1120115..1120393,1120466..1120578,1120650..1120965,1121154..1121361,1121439..1123366))	AGAP009237-PA-like protein		with AGAP ID	1	0.000351617
179	ASIC006468	1212	KFB39138	ASIC006468 AS2_scf7180000695681 CDS complement(join(1238455..1239455,1239520..1239730))	hypothetical protein		hypothetical protein	1	0.000825083
180	ASIC006529	2982	KFB39190	ASIC006529 AS2_scf7180000695681 CDS complement(join(1750782..1750910,1750990..1751341,1751416..1753916))	AGAP008728-PA-like protein		with AGAP ID	1	0.000335345
181	ASIC006532	1953	KFB39193	ASIC006532 AS2_scf7180000695681 CDS complement(join(1762102..1762712,1762791..1763138,1763206..1763990,1764963..1765171))	hypothetical protein		hypothetical protein	1	0.000512033
182	ASIC006551	4008	KFB39210	ASIC006551 AS2_scf7180000695681 CDS join(1901871..1902944,1903093..1903225,1904591..1904689,1907573..1907672,1907756..1907930,1909343..1909429,1909499..1909681,1909787..1910036,1916806..1916967,1917132..1917489,1917941..1919327)	hypothetical protein		hypothetical protein	1	0.000249501
183	ASIC006573	1482	KFB39229	ASIC006573 AS2_scf7180000695681 CDS join(2313845..2313895,2313970..2315184,2315251..2315466)	hypothetical protein		hypothetical protein	1	0.000674764
184	ASIC006628	657	KFB39276	ASIC006628 AS2_scf7180000695681 CDS 2856822..2857478	hypothetical protein		hypothetical protein	2	0.00304414
185	ASIC006659	2448	KFB39305	ASIC006659 AS2_scf7180000695681 CDS complement(join(3228823..3228865,3228931..3229356,3229424..3229779,3229843..3230946,3231023..3231420,3231524..3231644))	AGAP009166-PA-like protein	IKK1	Immunity	1	0.000408497
186	ASIC006661	5661	KFB39306	ASIC006661 AS2_scf7180000695681 CDS join(3233151..3233208,3234042..3234205,3235714..3235903,3235992..3236095,3236168..3236331,3236683..3236825,3237191..3238175,3238245..3238480,3238550..3241821,3241894..3242238)	hypothetical protein		hypothetical protein	1	0.000176647
187	ASIC006668	1824	KFB39312	ASIC006668 AS2_scf7180000695681 CDS join(3293046..3293077,3293145..3293641,3293714..3294938,3295005..3295074)	AGAP009171-PA-like protein		with AGAP ID	1	0.000548246
188	ASIC006680	267	KFB39323	ASIC006680 AS2_scf7180000695681 CDS complement(3379041..3379307)	4-phytase		AC2_annotated	1	0.00374532
189	ASIC006689	1479	KFB39331	ASIC006689 AS2_scf7180000695681 CDS complement(join(3595194..3595647,3596451..3597475))	hypothetical protein		hypothetical protein	1	0.000676133
190	ASIC006812	384	KFB39386	ASIC006812 AS2_scf7180000695684 CDS join(452583..452658,452715..453022)	hypothetical protein		hypothetical protein	1	0.00260417
191	ASIC006858	1311	KFB39517	ASIC006858 AS2_scf7180000695690 CDS join(1162772..1162889,1165485..1166205,1166276..1166747)	bacteria responsive protein 2		AC2_annotated	1	0.000762777
192	ASIC006862	3738	KFB39520	ASIC006862 AS2_scf7180000695690 CDS complement(join(1188955..1191239,1191378..1191771,1192146..1192366,1193346..1193592,1193684..1193871,1194781..1194925,1202420..1202667,1202719..1202728))	AGAP009628-PA-like protein		with AGAP ID	1	0.000267523
193	ASIC006870	360	KFB39422	ASIC006870 AS2_scf7180000695690 CDS 93086..93445	hypothetical protein		hypothetical protein	1	0.00277778
194	ASIC006881	252	KFB39423	ASIC006881 AS2_scf7180000695690 CDS complement(106385..106636)	cytochrome P450		Detoxification	1	0.00396825
195	ASIC006903	3471	KFB39425	ASIC006903 AS2_scf7180000695690 CDS join(123257..123331,123393..123992,129113..129986,130212..130909,130940..132163)	hypothetical protein		hypothetical protein	2	0.000576203
196	ASIC006915	345	KFB39427	ASIC006915 AS2_scf7180000695690 CDS complement(join(161704..161874,161910..162083))	TIGR01777 family protein		AC2_annotated	1	0.00289855
197	ASIC006937	300	KFB39446	ASIC006937 AS2_scf7180000695690 CDS complement(352297..352596)	glycosyl transferase		AC2_annotated	1	0.00333333
198	ASIC006938	456	KFB39447	ASIC006938 AS2_scf7180000695690 CDS complement(join(352941..353153,353436..353678))	protein export cytoplasm protein SecA ATPase RNA helicase		AC2_annotated	1	0.00219298
199	ASIC006939	219	KFB39448	ASIC006939 AS2_scf7180000695690 CDS complement(join(355900..356064,356157..356198,356508..356519))	PfkB domain-containing protein		AC2_annotated	1	0.00456621
200	ASIC006951	4452	KFB39415	ASIC006951 AS2_scf7180000695690 CDS complement(join(56122..59371,59508..60091,60160..60777))	AGAP008087-PA-like protein		Immunity	3	0.000673854
201	ASIC006965	1512	KFB39471	ASIC006965 AS2_scf7180000695690 CDS join(551753..551812,551873..552603,552708..552805,552872..552963,553030..553288,553374..553645)	AGAP008050-PA-like protein		with AGAP ID	1	0.000661376
202	ASIC006968	6513	KFB39474	ASIC006968 AS2_scf7180000695690 CDS complement(561046..567558)	AGAP008047-PA-like protein		with AGAP ID	1	0.000153539
203	ASIC006980	1479	KFB39485	ASIC006980 AS2_scf7180000695690 CDS 619696..621174	AGAP008042-PA-like protein		with AGAP ID	1	0.000676133
204	ASIC007022	1620	KFB39574	ASIC007022 AS2_scf7180000695694 CDS complement(join(46086..46753,49015..49841,49913..50037))	AGAP002040-PA-like protein		with AGAP ID	1	0.000617284
205	ASIC007057	1326	KFB39616	ASIC007057 AS2_scf7180000695697 CDS join(313150..314148,314331..314657)	AGAP013462-PA-like protein		uncharacterized protein	1	0.000754148
206	ASIC007067	1881	KFB39599	ASIC007067 AS2_scf7180000695697 CDS join(127819..127873,127956..128111,128208..128541,128618..129075,129223..129914,130392..130577)	AGAP004207-PA-like protein		uncharacterized protein	1	0.000531632
207	ASIC007078	546	KFB39626	ASIC007078 AS2_scf7180000695701 CDS complement(join(16730..16850,16949..17373))	hypothetical protein		hypothetical protein	1	0.0018315
208	ASIC007083	204	KFB39636	ASIC007083 AS2_scf7180000695702 CDS complement(join(125625..125726,125799..125900))	hypothetical protein	CEC1	hypothetical protein	1	0.00490196
209	ASIC007383	399	KFB39709	ASIC007383 AS2_scf7180000695705 CDS complement(join(180621..180940,180990..181068))	xaa-Pro aminopeptidase		AC2_annotated	1	0.00250627
210	ASIC007389	4260	KFB40000	ASIC007389 AS2_scf7180000695705 CDS complement(join(2861099..2861698,2861768..2862023,2862097..2863258,2863328..2863883,2863932..2864075,2864163..2864246,2893234..2894691))	AGAP009424-PA-like protein		uncharacterized protein	1	0.000234742
211	ASIC007425	807	KFB39733	ASIC007425 AS2_scf7180000695705 CDS complement(460604..461410)	AGAP007920-PA-like protein		uncharacterized protein	1	0.00123916
212	ASIC007433	2856	KFB39740	ASIC007433 AS2_scf7180000695705 CDS complement(join(494861..494911,495011..496324,496401..497450,498493..498933))	xanthine dehydrogenase		Detoxification	1	0.00035014
213	ASIC007467	1689	KFB39771	ASIC007467 AS2_scf7180000695705 CDS complement(join(641069..642001,642078..642387,644161..644295,647988..648042,648628..648778,651374..651478))	hypothetical protein		hypothetical protein	1	0.000592066
214	ASIC007487	282	KFB40028	ASIC007487 AS2_scf7180000695707 CDS 340278..340559	UDP-N-acetylglucosamine 1-carboxyvinyltransferase		AC2_annotated	2	0.0070922
215	ASIC007518	2199	KFB40058	ASIC007518 AS2_scf7180000695708 CDS join(169620..170250,170315..170521,170586..171946)	AGAP010180-PA-like protein		with AGAP ID	1	0.000454752
216	ASIC007569	816	KFB40195	ASIC007569 AS2_scf7180000695709 CDS 1044523..1045338	AGAP004899-PA-like protein		uncharacterized protein	1	0.00122549
217	ASIC007588	1242	KFB40213	ASIC007588 AS2_scf7180000695709 CDS join(1245577..1245696,1245764..1246783,1246851..1246952)	hypothetical protein		hypothetical protein	2	0.00161031
218	ASIC007634	438	KFB40102	ASIC007634 AS2_scf7180000695709 CDS join(299237..299481,299527..299719)	hypothetical protein		hypothetical protein	1	0.00228311
219	ASIC007650	684	KFB40081	ASIC007650 AS2_scf7180000695709 CDS 56885..57568	putative Sensor protein		AC2_annotated	1	0.00146199
220	ASIC007683	672	KFB40084	ASIC007683 AS2_scf7180000695709 CDS complement(join(72752..73333,73417..73506))	hypothetical protein		hypothetical protein	1	0.0014881
221	ASIC007782	699	KFB40297	ASIC007782 AS2_scf7180000695712 CDS join(357947..358233,358306..358469,358538..358664,358755..358875)	AGAP007303-PA-like protein		uncharacterized protein	1	0.00143062
222	ASIC007807	7068	KFB40318	ASIC007807 AS2_scf7180000695712 CDS complement(join(470733..471108,471165..471380,471437..471566,471635..471958,472211..472380,472453..473055,473133..473307,473387..473500,473580..473749,473815..475156,475232..475565,475930..477062,477583..479385,479456..479602,480168..480198))	AGAP007280-PA-like protein		uncharacterized protein	2	0.000282965
223	ASIC007821	1524	KFB40331	ASIC007821 AS2_scf7180000695712 CDS join(621762..621818,621886..623139,623209..623421)	AGAP007273-PA-like protein		uncharacterized protein	1	0.000656168
224	ASIC007823	807	KFB40333	ASIC007823 AS2_scf7180000695712 CDS complement(join(630696..631439,631623..631685))	AGAP007272-PA-like protein		uncharacterized protein	2	0.00247831
225	ASIC007824	1626	KFB40334	ASIC007824 AS2_scf7180000695712 CDS complement(join(632542..632621,633348..633588,633655..634908,634982..635032))	AGAP007271-PA-like protein		uncharacterized protein	1	0.000615006
226	ASIC007873	726	KFB40398	ASIC007873 AS2_scf7180000695713 CDS complement(join(260976..261355,261419..261764))	AGAP007173-PA-like protein	FADD	with AGAP ID	1	0.00137741
227	ASIC007949	4143	KFB40460	ASIC007949 AS2_scf7180000695721 CDS complement(join(9120..9402,9485..10765,11693..11869,11942..13990,14082..14249,20622..20806))	AGAP001775-PA-like protein		uncharacterized protein	2	0.000482742
228	ASIC007965	2295	KFB40478	ASIC007965 AS2_scf7180000695725 CDS join(91956..93848,93942..94343)	hypothetical protein		hypothetical protein	2	0.00087146
229	ASIC008005	6312	KFB40512	ASIC008005 AS2_scf7180000695729 CDS complement(join(145805..145916,146013..146176,146251..146590,146675..146845,146922..147125,148799..149387,149487..149776,149881..150104,151954..156171))	AGAP003013-PA-like protein		with AGAP ID	1	0.000158428
230	ASIC008064	312	KFB40565	ASIC008064 AS2_scf7180000695732 CDS complement(26140..26451)	dihydrolipoyl dehydrogenase		AC2_annotated	2	0.00641026
231	ASIC008068	1077	KFB40569	ASIC008068 AS2_scf7180000695732 CDS complement(join(41017..41504,41571..41762,41837..41997,42088..42323))	AGAP004480-PA-like protein		with AGAP ID	1	0.000928505
232	ASIC008110	942	KFB40595	ASIC008110 AS2_scf7180000695737 CDS complement(join(16787..17023,17105..17306,17377..17879))	AGAP002995-PA-like protein	Or59	odorant protein	1	0.00106157
233	ASIC008115	729	KFB40605	ASIC008115 AS2_scf7180000695739 CDS complement(join(112003..112234,112304..112769,112962..112992))	AGAP006417-PA-like protein		with AGAP ID	1	0.00137174
234	ASIC008152	5070	KFB40727	ASIC008152 AS2_scf7180000695742 CDS join(987371..991332,991405..991618,991749..992039,992119..992475,992544..992660,992740..992868)	AGAP001907-PA-like protein		uncharacterized protein	1	0.000197239
235	ASIC008153	2124	KFB40728	ASIC008153 AS2_scf7180000695742 CDS join(996725..996958,997027..998780,998862..998997)	AGAP001908-PA-like protein		with AGAP ID	1	0.00047081
236	ASIC008174	405	KFB40747	ASIC008174 AS2_scf7180000695742 CDS complement(join(1084414..1084437,1084547..1084927))	hypothetical protein		hypothetical protein	2	0.00493827
237	ASIC008182	315	KFB40754	ASIC008182 AS2_scf7180000695742 CDS 1180172..1180486	group 1 glycosyl transferase		AC2_annotated	1	0.0031746
238	ASIC008191	4638	KFB40762	ASIC008191 AS2_scf7180000695742 CDS complement(join(1322220..1322539,1322596..1326693,1326756..1326959,1327027..1327042))	AGAP001929-PA-like protein		with AGAP ID	1	0.00021561
239	ASIC008209	2223	KFB40779	ASIC008209 AS2_scf7180000695742 CDS join(1578801..1578980,1579065..1581107)	hypothetical protein		hypothetical protein	1	0.000449843
240	ASIC008219	1860	KFB40788	ASIC008219 AS2_scf7180000695742 CDS complement(join(1643637..1643906,1643970..1644065,1644217..1645710))	AGAP013075-PA-like protein		uncharacterized protein	1	0.000537634
241	ASIC008221	5319	KFB40790	ASIC008221 AS2_scf7180000695742 CDS complement(join(1664566..1666407,1666474..1666686,1666750..1670013))	AGAP001949-PA-like protein		uncharacterized protein	1	0.000188005
242	ASIC008242	492	KFB40808	ASIC008242 AS2_scf7180000695742 CDS join(1789302..1789533,1789587..1789846)	two component system sensor histidine kinase, GAF region		AC2_annotated	1	0.00203252
243	ASIC008314	2100	KFB40694	ASIC008314 AS2_scf7180000695742 CDS complement(join(812503..814584,814654..814671))	AGAP001879-PA-like protein		with AGAP ID	1	0.00047619
244	ASIC008343	3141	KFB40721	ASIC008343 AS2_scf7180000695742 CDS join(946743..949525,949591..949948)	AGAP001897-PA-like protein		with AGAP ID	1	0.00031837
245	ASIC008361	4314	KFB40831	ASIC008361 AS2_scf7180000695745 CDS join(75170..76670,76834..78310,78376..78702,79699..80280,81458..81658,82002..82056,83500..83670)	AGAP001324-PA-like protein		with AGAP ID	1	0.000231803
246	ASIC008371	1569	KFB40848	ASIC008371 AS2_scf7180000695747 CDS join(374576..374593,375067..375333,375406..376442,376508..376754)	AGAP011507-PA-like protein	COE13O	Detoxification	1	0.000637349
247	ASIC008383	1305	KFB40858	ASIC008383 AS2_scf7180000695747 CDS 463359..464663	transcription factor Sp8		AC2_annotated	1	0.000766284
248	ASIC008461	7764	KFB40921	ASIC008461 AS2_scf7180000695757 CDS complement(join(42931..44075,44685..45219,45628..48068,48154..50046,50480..50856,51682..52030,52101..52201,52478..52848,52925..53476))	AGAP002735-PA-like protein		with AGAP ID	1	0.0001288
249	ASIC008467	5400	KFB40932	ASIC008467 AS2_scf7180000695760 CDS complement(82853..88252)	AGAP010934-PA-like protein		uncharacterized protein	1	0.000185185
250	ASIC008499	447	KFB40948	ASIC008499 AS2_scf7180000695761 CDS 42348..42794	2Fe-2S iron-sulfur cluster binding domain-containing protein		AC2_annotated	1	0.00223714
251	ASIC008528	300	KFB41073	ASIC008528 AS2_scf7180000695763 CDS complement(1148367..1148666)	Ghrelin O-acyltransferase		AC2_annotated	1	0.00333333
252	ASIC008531	1593	KFB41076	ASIC008531 AS2_scf7180000695763 CDS complement(join(1166207..1166286,1166364..1166535,1166603..1167065,1167139..1167853,1168000..1168162))	hypothetical protein	EGFR	hypothetical protein	1	0.000627746
253	ASIC008537	222	KFB41081	ASIC008537 AS2_scf7180000695763 CDS complement(1225716..1225937)	hypothetical protein		hypothetical protein	1	0.0045045
254	ASIC008568	252	KFB41110	ASIC008568 AS2_scf7180000695763 CDS 1433853..1434104	TCB3-like protein		AC2_annotated	1	0.00396825
255	ASIC008579	309	KFB41120	ASIC008579 AS2_scf7180000695763 CDS 1491628..1491936	SH3 domain-containing protein		AC2_annotated	1	0.00323625
256	ASIC008587	2103	KFB41127	ASIC008587 AS2_scf7180000695763 CDS complement(join(1541185..1542147,1542215..1543354))	AGAP009032-PA-like protein		with AGAP ID	1	0.000475511
257	ASIC008589	174	KFB41128	ASIC008589 AS2_scf7180000695763 CDS complement(1547225..1547398)	hypothetical protein		hypothetical protein	1	0.00574713
258	ASIC008614	486	KFB41001	ASIC008614 AS2_scf7180000695763 CDS complement(join(393496..393832,393912..394060))	hypothetical protein		hypothetical protein	1	0.00205761
259	ASIC008618	1674	KFB40969	ASIC008618 AS2_scf7180000695763 CDS complement(join(28844..30278,30343..30581))	AGAP008651-PA-like protein		with AGAP ID	1	0.000597372
260	ASIC008637	246	KFB41021	ASIC008637 AS2_scf7180000695763 CDS complement(join(648101..648212,648268..648401))	hypothetical protein		hypothetical protein	1	0.00406504
261	ASIC008639	726	KFB41023	ASIC008639 AS2_scf7180000695763 CDS join(658547..658983,659135..659423)	KpsF/GutQ family protein		AC2_annotated	2	0.00275482
262	ASIC008665	1266	KFB41044	ASIC008665 AS2_scf7180000695763 CDS join(834673..834837,835857..835914,837090..837444,837889..838100,838165..838244,838315..838436,838577..838807,838880..838922)	hypothetical protein		hypothetical protein	1	0.000789889
263	ASIC008682	219	KFB41060	ASIC008682 AS2_scf7180000695763 CDS complement(1039731..1039949)	DEAD/DEAH box helicase		AC2_annotated	1	0.00456621
264	ASIC008743	366	KFB41181	ASIC008743 AS2_scf7180000695780 CDS complement(join(353282..353594,353768..353820))	alpha-ketoglutarate decarboxylase		AC2_annotated	1	0.00273224
265	ASIC008763	2265	KFB41199	ASIC008763 AS2_scf7180000695780 CDS join(626007..626894,629221..629663,631074..631950,632039..632095)	hypothetical protein		hypothetical protein	1	0.000441501
266	ASIC008819	4548	KFB41336	ASIC008819 AS2_scf7180000695787 CDS join(1317902..1318256,1318480..1318660,1318724..1319093,1319158..1319457,1321620..1321983,1322084..1322202,1322285..1322450,1327344..1327385,1328329..1328486,1328579..1328857,1328935..1329857,1329926..1330086,1330147..1330397,1330481..1331174,1331245..1331395,1332765..1332798)	AGAP003656-PB-like protein		with AGAP ID	1	0.000219877
267	ASIC008848	411	KFB41258	ASIC008848 AS2_scf7180000695787 CDS complement(500216..500626)	hypothetical protein		hypothetical protein	1	0.00243309
268	ASIC008859	279	KFB41268	ASIC008859 AS2_scf7180000695787 CDS complement(join(562639..562723,563038..563231))	G-protein-coupled receptor GPR34 type 1		AC2_annotated	1	0.00358423
269	ASIC008864	192	KFB41272	ASIC008864 AS2_scf7180000695787 CDS complement(join(612375..612532,612583..612616))	hypothetical protein		hypothetical protein	1	0.00520833
270	ASIC008874	261	KFB41228	ASIC008874 AS2_scf7180000695787 CDS join(132602..132680,132918..133099)	AGAP004059-PA-like protein		with AGAP ID	2	0.00766284
271	ASIC008895	360	KFB41301	ASIC008895 AS2_scf7180000695787 CDS join(976986..977159,977261..977446)	isoleucyl-tRNA synthase		AC2_annotated	1	0.00277778
272	ASIC008912	14013	KFB41316	ASIC008912 AS2_scf7180000695787 CDS join(1068569..1068611,1068841..1070703,1070818..1070875,1070947..1071901,1071971..1073645,1073724..1076140,1076257..1076743,1076906..1077309,1077830..1079511,1079585..1079708,1079776..1079963,1080043..1080313,1080390..1081247,1081344..1081534,1081604..1082618,1082692..1082906,1082980..1083103,1083172..1083379,1083444..1084678)	hypothetical protein		hypothetical protein	3	0.000214087
273	ASIC008921	2133	KFB41341	ASIC008921 AS2_scf7180000695788 CDS complement(join(27271..28880,28943..29243,29308..29457,29542..29613))	AGAP003323-PA-like protein		with AGAP ID	1	0.000468823
274	ASIC008956	2052	KFB41349	ASIC008956 AS2_scf7180000695799 CDS join(12353..12438,12895..13064,13597..14287,15593..16697)	AGAP010428-PA-like protein		with AGAP ID	1	0.000487329
275	ASIC008957	660	KFB41375	ASIC008957 AS2_scf7180000695799 CDS complement(join(221035..221293,221466..221599,222434..222558,222594..222735))	malate dehydrogenase (nad)		AC2_annotated	1	0.00151515
276	ASIC008963	4365	KFB41352	ASIC008963 AS2_scf7180000695799 CDS complement(join(31384..31738,32835..35618,36486..36905,37170..37301,37386..37702,38870..39226))	hypothetical protein		hypothetical protein	1	0.000229095
277	ASIC008985	156	KFB41401	ASIC008985 AS2_scf7180000695800 CDS 220184..220339	CobW protein		AC2_annotated	1	0.00641026
278	ASIC009022	3060	KFB41435	ASIC009022 AS2_scf7180000695801 CDS join(235253..235262,235596..236180,238872..239289,245972..246211,247286..247422,247713..248019,248111..248502,248586..248746,248815..249178,249245..249309,249380..249608,249684..249835)	AGAP003479-PA-like protein		uncharacterized protein	1	0.000326797
279	ASIC009050	240	KFB41451	ASIC009050 AS2_scf7180000695805 CDS join(90231..90349,90430..90550)	molybdate ABC transporter ATP-binding protein		AC2_annotated	1	0.00416667
280	ASIC009060	348	KFB41469	ASIC009060 AS2_scf7180000695806 CDS 210627..210974	integral membrane protein		AC2_annotated	1	0.00287356
281	ASIC009067	636	KFB41475	ASIC009067 AS2_scf7180000695806 CDS join(250473..250949,251719..251877)	ATPase AAA		AC2_annotated	1	0.00157233
282	ASIC009070	4506	KFB41478	ASIC009070 AS2_scf7180000695806 CDS join(260231..261831,261895..262373,262444..262582,263088..263817,263861..264630,264688..265175,265255..265553)	AGAP008548-PA-like protein		with AGAP ID	1	0.000221926
283	ASIC009223	318	KFB41616	ASIC009223 AS2_scf7180000695821 CDS 61039..61356	hypothetical protein		hypothetical protein	1	0.00314465
284	ASIC009227	669	KFB41606	ASIC009227 AS2_scf7180000695821 CDS join(17118..17207,17291..17713,17795..17950)	AGAP003257-PA-like protein	GSTU2	Detoxification	1	0.00149477
285	ASIC009304	648	KFB41676	ASIC009304 AS2_scf7180000695847 CDS complement(114857..115504)	AGAP010466-PA-like protein		uncharacterized protein	1	0.00154321
286	ASIC009322	516	KFB41693	ASIC009322 AS2_scf7180000695847 CDS complement(join(167766..168034,168206..168452))	hypothetical protein		hypothetical protein	1	0.00193798
287	ASIC009323	1431	KFB41694	ASIC009323 AS2_scf7180000695847 CDS join(209765..210132,210295..211165,213916..214021,214826..214911)	hypothetical protein		hypothetical protein	1	0.000698812
288	ASIC009326	4233	KFB41696	ASIC009326 AS2_scf7180000695847 CDS join(235091..235574,238346..239030,239922..240297,243824..244139,244191..245143,245216..245380,245466..245779,245856..245995,246187..246392,246753..246858,246955..247323,247744..247862)	AGAP010474-PA-like protein		with AGAP ID	2	0.000472478
289	ASIC009354	519	KFB41723	ASIC009354 AS2_scf7180000695850 CDS complement(186827..187345)	hypothetical protein		hypothetical protein	1	0.00192678
290	ASIC009377	1185	KFB41716	ASIC009377 AS2_scf7180000695850 CDS join(102940..103878,103948..104193)	AGAP001012-PA-like protein	Or36	odorant protein	1	0.000843882
291	ASIC009423	1500	KFB41776	ASIC009423 AS2_scf7180000695859 CDS join(3..388,465..879,2192..2588,2653..2848,2938..3043)	AGAP006444-PA-like protein		with AGAP ID	1	0.000666667
292	ASIC009449	2520	KFB41890	ASIC009449 AS2_scf7180000695865 CDS complement(join(886010..886083,886166..886329,886418..886575,887324..887387,887767..887878,887941..888219,888285..888508,888582..888875,888938..889130,889199..889412,890605..890779,890854..890936,891001..891221,891290..891419,891489..891623))	AGAP000519-PA-like protein		with AGAP ID	1	0.000396825
293	ASIC009537	4782	KFB41968	ASIC009537 AS2_scf7180000695865 CDS join(1541592..1541682,1541814..1542046,1543404..1543491,1543576..1543730,1552582..1552751,1552834..1553414,1553483..1553730,1554715..1554918,1554987..1555102,1555171..1555309,1555394..1555887,1555960..1556999,1557734..1558218,1558304..1558813,1558878..1559105)	AGAP013042-PA-like protein		uncharacterized protein	1	0.000209118
294	ASIC009578	1551	KFB41811	ASIC009578 AS2_scf7180000695865 CDS complement(171518..173068)	vasa-like protein		AC2_annotated	2	0.00128949
295	ASIC009593	2916	KFB42014	ASIC009593 AS2_scf7180000695865 CDS join(2048139..2048489,2048639..2051203)	AGAP000666-PA-like protein		with AGAP ID	1	0.000342936
296	ASIC009595	360	KFB42016	ASIC009595 AS2_scf7180000695865 CDS join(2067373..2067579,2068141..2068293)	hypothetical protein		hypothetical protein	1	0.00277778
297	ASIC009618	249	KFB42037	ASIC009618 AS2_scf7180000695865 CDS complement(join(2227625..2227825,2228075..2228122))	hypothetical protein		hypothetical protein	1	0.00401606
298	ASIC009651	411	KFB42067	ASIC009651 AS2_scf7180000695865 CDS join(2647479..2647593,2647876..2648171)	hypothetical protein		hypothetical protein	1	0.00243309
299	ASIC009668	1623	KFB41793	ASIC009668 AS2_scf7180000695865 CDS complement(join(30685..30994,34474..34619,35037..35318,36623..36775,36857..36944,37059..37231,37312..37479,40173..40403,43484..43555))	AGAP000203-PA-like protein		with AGAP ID	1	0.000616143
300	ASIC009678	327	KFB41838	ASIC009678 AS2_scf7180000695865 CDS complement(409453..409779)	hypothetical protein	IR7s	hypothetical protein	1	0.0030581
301	ASIC009728	495	KFB41882	ASIC009728 AS2_scf7180000695865 CDS 806136..806630	HEAT repeat-containing protein 2		AC2_annotated	1	0.0020202
302	ASIC009749	303	KFB42090	ASIC009749 AS2_scf7180000695869 CDS 313514..313816	hypothetical protein		hypothetical protein	1	0.00330033
303	ASIC009759	1347	KFB42099	ASIC009759 AS2_scf7180000695869 CDS join(354392..355210,355368..355752,355838..355980)	AGAP012952-PA-like protein		uncharacterized protein	1	0.00074239
304	ASIC009767	294	KFB42106	ASIC009767 AS2_scf7180000695869 CDS 379607..379900	hypothetical protein		hypothetical protein	1	0.00340136
305	ASIC009770	216	KFB42109	ASIC009770 AS2_scf7180000695869 CDS join(473269..473472,473834..473845)	hypothetical protein		hypothetical protein	1	0.00462963
306	ASIC009780	1965	KFB42085	ASIC009780 AS2_scf7180000695869 CDS complement(join(232655..233530,233596..233953,234693..235240,235371..235553))	AGAP003297-PA-like protein		uncharacterized protein	1	0.000508906
307	ASIC009841	2064	KFB42174	ASIC009841 AS2_scf7180000695875 CDS complement(join(59789..60857,61883..62877))	AGAP004017-PA-like protein		uncharacterized protein	1	0.000484496
308	ASIC009856	1596	KFB42186	ASIC009856 AS2_scf7180000695876 CDS 180466..182061	AGAP001423-PA-like protein		with AGAP ID	1	0.000626566
309	ASIC009871	1416	KFB42180	ASIC009871 AS2_scf7180000695876 CDS join(131383..131571,131688..132399,132484..132998)	AGAP001430-PA-like protein		uncharacterized protein	1	0.000706215
310	ASIC009884	1413	KFB42210	ASIC009884 AS2_scf7180000695878 CDS join(146845..148213,148288..148331)	AGAP006124-PA-like protein		with AGAP ID	1	0.000707714
311	ASIC009890	1749	KFB42214	ASIC009890 AS2_scf7180000695878 CDS complement(join(166749..166904,166977..167118,167191..167324,167435..167942,168017..168799,168833..168858))	hypothetical protein		hypothetical protein	1	0.000571755
312	ASIC009894	9024	KFB42218	ASIC009894 AS2_scf7180000695878 CDS complement(join(179008..179330,179398..179482,180234..180429,180520..180687,180772..180993,181377..181525,181998..182644,182730..183189,188679..188872,188966..189140,189663..190316,190377..190633,191089..191364,191447..191851,191939..196432,196963..197281))	AGAP006133-PA-like protein		with AGAP ID	1	0.000110816
313	ASIC009904	201	KFB42202	ASIC009904 AS2_scf7180000695878 CDS 47914..48114	oxidoreductase		AC2_annotated	1	0.00497512
314	ASIC009916	1995	KFB42239	ASIC009916 AS2_scf7180000695880 CDS join(96577..98094,98169..98645)	AGAP003787-PA-like protein		with AGAP ID	1	0.000501253
315	ASIC009939	1011	KFB42260	ASIC009939 AS2_scf7180000695882 CDS join(95927..96124,96186..96742,97365..97620)	hypothetical protein		hypothetical protein	1	0.00098912
316	ASIC009949	555	KFB42269	ASIC009949 AS2_scf7180000695882 CDS 121895..122449	AGAP009655-PA-like protein		with AGAP ID	1	0.0018018
317	ASIC009951	1056	KFB42271	ASIC009951 AS2_scf7180000695882 CDS join(125040..125185,125437..126346)	hypothetical protein		hypothetical protein	1	0.00094697
318	ASIC009962	597	KFB42281	ASIC009962 AS2_scf7180000695882 CDS complement(join(302670..302720,303309..303521,304231..304563))	hypothetical protein		hypothetical protein	1	0.00167504
319	ASIC009989	2247	KFB42304	ASIC009989 AS2_scf7180000695882 CDS complement(join(598698..600444,600546..601045))	hypothetical protein		hypothetical protein	1	0.000445038
320	ASIC010011	387	KFB42323	ASIC010011 AS2_scf7180000695882 CDS complement(757286..757672)	harmonin		AC2_annotated	1	0.00258398
321	ASIC010071	2391	KFB42379	ASIC010071 AS2_scf7180000695889 CDS complement(join(159177..161335,161400..161564,161656..161722))	AGAP005474-PA-like protein		uncharacterized protein	2	0.00083647
322	ASIC010093	204	KFB42399	ASIC010093 AS2_scf7180000695889 CDS 367227..367430	MHC class II antigen		AC2_annotated	1	0.00490196
323	ASIC010117	282	KFB42420	ASIC010117 AS2_scf7180000695893 CDS complement(260721..261002)	hypothetical protein		hypothetical protein	1	0.0035461
324	ASIC010236	681	KFB42527	ASIC010236 AS2_scf7180000695903 CDS complement(join(274548..275127,275594..275694))	AGAP000537-PA-like protein	TWDL8	Cuticular protein	1	0.00146843
325	ASIC010332	303	KFB42611	ASIC010332 AS2_scf7180000695906 CDS complement(join(15372..15483,15545..15735))	hypothetical protein		hypothetical protein	1	0.00330033
326	ASIC010418	717	KFB42682	ASIC010418 AS2_scf7180000695920 CDS complement(404045..404761)	hypothetical protein		hypothetical protein	1	0.0013947
327	ASIC010428	3510	KFB42650	ASIC010428 AS2_scf7180000695920 CDS complement(join(65652..67765,67833..68001,68070..68721,68794..69075,72630..72716,78094..78299))	hypothetical protein		hypothetical protein	1	0.0002849
328	ASIC010437	10689	KFB42699	ASIC010437 AS2_scf7180000695920 CDS join(546846..548498,551325..551471,551521..551638,551698..552412,554406..559081,560507..561024,562120..562257,562575..562883,562958..563194,563357..564946,565042..565329,565401..565512,567421..567608)	AGAP005285-PA-like protein		uncharacterized protein	1	9.35541e-05
329	ASIC010441	13101	KFB42702	ASIC010441 AS2_scf7180000695920 CDS join(588133..588280,588766..591077,592151..592825,592898..593021,593486..594403,594470..596302,596453..601813,604178..604462,604730..605223,605307..605561,606807..607144,607248..607456,607678..607826)	hypothetical protein		hypothetical protein	1	7.63301e-05
330	ASIC010491	300	KFB42745	ASIC010491 AS2_scf7180000695925 CDS 18945..19244	hypothetical protein		hypothetical protein	1	0.00333333
331	ASIC010503	246	KFB42750	ASIC010503 AS2_scf7180000695929 CDS 15104..15349	hypothetical protein		hypothetical protein	1	0.00406504
332	ASIC010563	519	KFB42812	ASIC010563 AS2_scf7180000695932 CDS join(470494..470802,470844..471053)	peptidase M48 Ste24p		AC2_annotated	1	0.00192678
333	ASIC010568	1929	KFB42816	ASIC010568 AS2_scf7180000695932 CDS complement(join(496928..498163,498238..498899,499116..499146))	AGAP002525-PA-like protein		with AGAP ID	1	0.000518403
334	ASIC010614	507	KFB42861	ASIC010614 AS2_scf7180000695934 CDS join(226346..226402,226471..226641,226721..226999)	D7-related 3.2 protein		AC2_annotated	1	0.00197239
335	ASIC010615	444	KFB42862	ASIC010615 AS2_scf7180000695934 CDS complement(join(228265..228591,228654..228770))	AGAP008279-PA-like protein		uncharacterized protein	1	0.00225225
336	ASIC010634	285	KFB42879	ASIC010634 AS2_scf7180000695934 CDS complement(351369..351653)	xanthine dehydrogenase 1-like protein		AC2_annotated	1	0.00350877
337	ASIC010644	333	KFB42888	ASIC010644 AS2_scf7180000695934 CDS join(436590..436753,436795..436963)	acyl-CoA thioesterase II TesB1		AC2_annotated	2	0.00600601
338	ASIC010680	402	KFB43008	ASIC010680 AS2_scf7180000695939 CDS complement(971000..971401)	hypothetical protein		hypothetical protein	1	0.00248756
339	ASIC010691	4083	KFB43018	ASIC010691 AS2_scf7180000695939 CDS complement(join(1047564..1049823,1049902..1050556,1050632..1050933,1054999..1055338,1067294..1067650,1067913..1068081))	hypothetical protein		hypothetical protein	1	0.000244918
340	ASIC010696	1857	KFB43023	ASIC010696 AS2_scf7180000695939 CDS join(1101517..1101651,1101724..1102489,1102625..1102965,1103183..1103345,1103420..1103547,1103619..1103942)	zinc finger protein 28		AC2_annotated	3	0.00161551
341	ASIC010716	4782	KFB43041	ASIC010716 AS2_scf7180000695939 CDS join(1190558..1190635,1190738..1190845,1190919..1191162,1191231..1191333,1191396..1191814,1193233..1197062)	hypothetical protein		hypothetical protein	1	0.000209118
342	ASIC010745	1518	KFB42919	ASIC010745 AS2_scf7180000695939 CDS complement(130192..131709)	hypothetical protein		hypothetical protein	2	0.00131752
343	ASIC010761	825	KFB43080	ASIC010761 AS2_scf7180000695939 CDS join(1737922..1738150,1738223..1738818)	hypothetical protein		hypothetical protein	1	0.00121212
344	ASIC010777	1260	KFB43095	ASIC010777 AS2_scf7180000695939 CDS join(1863659..1863682,1863792..1865027)	hypothetical protein		hypothetical protein	1	0.000793651
345	ASIC010782	354	KFB43098	ASIC010782 AS2_scf7180000695939 CDS complement(join(1879182..1879455,1879517..1879596))	molybdenum cofactor biosynthesis protein MoaA		AC2_annotated	1	0.00282486
346	ASIC010832	1770	KFB42959	ASIC010832 AS2_scf7180000695939 CDS complement(join(504112..504512,504577..504782,504858..504971,505047..505354,505588..506035,506105..506313,506422..506505))	AGAP009044-PA-like protein		with AGAP ID	1	0.000564972
347	ASIC010852	6927	KFB42977	ASIC010852 AS2_scf7180000695939 CDS join(656523..660122,660184..660410,660532..660852,660923..663701)	hypothetical protein		hypothetical protein	2	0.000288725
348	ASIC011007	1764	KFB43230	ASIC011007 AS2_scf7180000695947 CDS join(238843..238976,239047..239189,239264..239430,242053..242140,242465..242667,242741..242883,243115..243261,243348..243536,243599..243671,243735..244211)	AGAP007095-PA-like protein		uncharacterized protein	1	0.000566893
349	ASIC011011	6015	KFB43234	ASIC011011 AS2_scf7180000695947 CDS complement(join(250836..252092,252143..255007,255130..255270,255493..256070,264770..264856,268466..268723,274385..274495,291215..291313,291492..291722,292605..292992))	AGAP007099-PA-like protein		uncharacterized protein	1	0.000166251
350	ASIC011020	1587	KFB43242	ASIC011020 AS2_scf7180000695947 CDS join(362511..362530,362602..362768,362836..363262,363326..364298)	AGAP007102-PA-like protein		with AGAP ID	1	0.00063012
351	ASIC011031	249	KFB43251	ASIC011031 AS2_scf7180000695947 CDS 502670..502918	arabinose ABC transporter permease		AC2_annotated	1	0.00401606
352	ASIC011034	1899	KFB43254	ASIC011034 AS2_scf7180000695947 CDS complement(521234..523132)	AGAP000320-PB-like protein		with AGAP ID	1	0.000526593
353	ASIC011049	6270	KFB43267	ASIC011049 AS2_scf7180000695947 CDS complement(join(727225..728517,730229..731025,732066..732578,732723..732811,733012..736589))	hypothetical protein		hypothetical protein	1	0.00015949
354	ASIC011062	759	KFB43278	ASIC011062 AS2_scf7180000695947 CDS join(797029..797643,797858..798001)	AGAP005527-PA-like protein	NMDAR3	with AGAP ID	2	0.00263505
355	ASIC011064	11253	KFB43280	ASIC011064 AS2_scf7180000695947 CDS join(808188..808264,809623..809895,809975..810653,810719..810949,811166..811564,811631..813221,814456..815862,815928..816271,816352..816721,816787..817119,817217..817420,817513..820569,820906..822215,822279..822359,823589..824485)	AGAP005526-PA-like protein		with AGAP ID	3	0.000266596
356	ASIC011065	2637	KFB43281	ASIC011065 AS2_scf7180000695947 CDS complement(join(824994..826553,826625..827088,827155..827524,827598..827840))	AGAP005525-PA-like protein		uncharacterized protein	2	0.000758438
357	ASIC011115	1692	KFB43316	ASIC011115 AS2_scf7180000695956 CDS join(5458..5542,13280..13382,16735..17261,25540..25705,29933..30049,36456..36898,36968..37105,37840..37952)	AGAP003400-PA-like protein		uncharacterized protein	2	0.00118203
358	ASIC011121	324	KFB43329	ASIC011121 AS2_scf7180000695956 CDS complement(join(109594..109757,109834..109924,110372..110440))	hypothetical protein		hypothetical protein	1	0.00308642
359	ASIC011127	1119	KFB43334	ASIC011127 AS2_scf7180000695956 CDS join(133515..134322,134387..134697)	AGAP003420-PA-like protein		uncharacterized protein	1	0.000893655
360	ASIC011193	219	KFB43397	ASIC011193 AS2_scf7180000695959 CDS complement(293564..293782)	membrane protein		AC2_annotated	1	0.00456621
361	ASIC011322	879	KFB43516	ASIC011322 AS2_scf7180000695967 CDS complement(join(119994..120236,120312..120672,120741..121015))	AGAP003733-PA-like protein		with AGAP ID	1	0.00113766
362	ASIC011402	186	KFB43675	ASIC011402 AS2_scf7180000695970 CDS complement(join(1193358..1193464,1193694..1193772))	hypothetical protein		hypothetical protein	1	0.00537634
363	ASIC011404	639	KFB43676	ASIC011404 AS2_scf7180000695970 CDS 1194065..1194703	AGAP013056-PA-like protein		with AGAP ID	1	0.00156495
364	ASIC011569	2271	KFB43627	ASIC011569 AS2_scf7180000695970 CDS complement(join(531167..532225,532350..533348,533670..533882))	AGAP001118-PA-like protein		uncharacterized protein	1	0.000440335
365	ASIC011598	306	KFB43654	ASIC011598 AS2_scf7180000695970 CDS complement(join(954108..954306,954494..954600))	MIP family channel protein		AC2_annotated	1	0.00326797
366	ASIC011632	357	KFB43792	ASIC011632 AS2_scf7180000695971 CDS complement(513612..513968)	hypothetical protein		hypothetical protein	1	0.00280112
367	ASIC011723	2670	KFB43900	ASIC011723 AS2_scf7180000695972 CDS complement(join(83588..83855,83927..84102,84171..84952,85026..85869,86682..87281))	AGAP002217-PA-like protein		with AGAP ID	2	0.000749064
368	ASIC011724	408	KFB43901	ASIC011724 AS2_scf7180000695972 CDS 88346..88753	hypothetical protein		hypothetical protein	1	0.00245098
369	ASIC011728	1833	KFB43905	ASIC011728 AS2_scf7180000695972 CDS complement(join(108549..109489,109656..110135,111665..111739,111818..112154))	AGAP002214-PA-like protein		uncharacterized protein	1	0.000545554
370	ASIC011729	417	KFB43906	ASIC011729 AS2_scf7180000695972 CDS complement(119670..120086)	hypothetical protein		hypothetical protein	2	0.00479616
371	ASIC011755	2676	KFB43895	ASIC011755 AS2_scf7180000695972 CDS complement(join(42770..43984,44058..44570,44943..45090,45162..45517,45589..45710,45785..45964,52537..52678))	AGAP002224-PA-like protein		with AGAP ID	1	0.000373692
372	ASIC011781	2655	KFB43953	ASIC011781 AS2_scf7180000695972 CDS complement(609593..612247)	AGAP005345-PA-like protein		uncharacterized protein	1	0.000376648
373	ASIC011850	3531	KFB43969	ASIC011850 AS2_scf7180000695974 CDS complement(join(72631..72914,73860..74202,77469..80349,80634..80656))	hypothetical protein		hypothetical protein	1	0.000283206
374	ASIC011867	333	KFB44037	ASIC011867 AS2_scf7180000695975 CDS 313369..313701	indolepyruvate ferredoxin oxidoreductase subunit alpha		AC2_annotated	1	0.003003
375	ASIC011892	255	KFB44061	ASIC011892 AS2_scf7180000695976 CDS complement(161343..161597)	hypothetical protein		hypothetical protein	1	0.00392157
376	ASIC011903	1071	KFB44071	ASIC011903 AS2_scf7180000695976 CDS complement(308931..310001)	serine protease 14	CLIPB4	Immunity	2	0.00186741
377	ASIC011920	2733	KFB44086	ASIC011920 AS2_scf7180000695976 CDS complement(join(548732..549014,549083..549918,549984..550226,550300..550526,550692..551835))	hypothetical protein		hypothetical protein	2	0.000731797
378	ASIC011921	1461	KFB44087	ASIC011921 AS2_scf7180000695976 CDS complement(join(551925..553369,553432..553447))	hypothetical protein		hypothetical protein	1	0.000684463
379	ASIC011925	417	KFB44090	ASIC011925 AS2_scf7180000695976 CDS complement(590102..590518)	membrane-associated guanylate kinase, WW and PDZ domain-containing protein 2 isoform 2		AC2_annotated	1	0.00239808
380	ASIC011931	456	KFB44096	ASIC011931 AS2_scf7180000695976 CDS join(642553..642776,642860..642967,643334..643457)	hypothetical protein		hypothetical protein	1	0.00219298
381	ASIC011953	1695	KFB44102	ASIC011953 AS2_scf7180000695977 CDS complement(join(22093..22518,22571..23839))	AGAP002367-PA-like protein		uncharacterized protein	1	0.000589971
382	ASIC011956	411	KFB44121	ASIC011956 AS2_scf7180000695977 CDS 170741..171151	AGAP002382-PA-like protein		uncharacterized protein	3	0.00729927
383	ASIC011962	3996	KFB44127	ASIC011962 AS2_scf7180000695977 CDS complement(join(182489..182884,183406..183669,183746..183858,185222..185378,185536..185794,185931..188737))	hypothetical protein		hypothetical protein	2	0.000500501
384	ASIC012012	2109	KFB44172	ASIC012012 AS2_scf7180000695977 CDS complement(join(423374..424324,424402..425075,425135..425372,425444..425589,425707..425806))	hypothetical protein		hypothetical protein	1	0.000474158
385	ASIC012049	2355	KFB44271	ASIC012049 AS2_scf7180000695980 CDS complement(join(526176..526303,526983..527114,546948..547247,547519..547643,547706..547927,548000..548214,548296..548429,548503..548658,550329..550771,551654..551831,551898..552038,552120..552285,552419..552433))	AGAP009860-PA-like protein		uncharacterized protein	1	0.000424628
386	ASIC012065	5400	KFB44203	ASIC012065 AS2_scf7180000695980 CDS complement(join(211625..212455,212622..215010,215084..216811,216880..217196,217265..217399))	fatty acid synthase S-acetyltransferase		Detoxification	1	0.000185185
387	ASIC012110	654	KFB44218	ASIC012110 AS2_scf7180000695980 CDS join(296816..297007,297093..297322,297505..297655,298243..298323)	AGAP008443-PA-like protein		with AGAP ID	1	0.00152905
388	ASIC012133	360	KFB44239	ASIC012133 AS2_scf7180000695980 CDS complement(join(378440..378572,378672..378898))	hypothetical protein		hypothetical protein	1	0.00277778
389	ASIC012152	876	KFB44284	ASIC012152 AS2_scf7180000695981 CDS complement(join(93577..93922,93996..94398,94654..94780))	hypothetical protein	TWDL11	hypothetical protein	1	0.00114155
390	ASIC012154	1512	KFB44286	ASIC012154 AS2_scf7180000695981 CDS complement(join(110842..111094,111540..111731,111795..112861))	AGAP001544-PB-like protein		with AGAP ID	1	0.000661376
391	ASIC012159	1872	KFB44291	ASIC012159 AS2_scf7180000695981 CDS join(128545..130209,130284..130490)	AGAP001373-PA-like protein		uncharacterized protein	1	0.000534188
392	ASIC012161	1173	KFB44293	ASIC012161 AS2_scf7180000695981 CDS 134454..135626	TRIO salivary gland protein precursor		AC2_annotated	1	0.000852515
393	ASIC012167	1443	KFB44298	ASIC012167 AS2_scf7180000695981 CDS join(156540..156564,156994..157698,157785..158209,158297..158584)	AGAP001377-PA-like protein	SRPN11	Immunity	1	0.000693001
394	ASIC012171	5286	KFB44302	ASIC012171 AS2_scf7180000695981 CDS complement(join(204193..204326,204425..204569,204647..204835,204905..205046,205122..205474,205550..206526,206607..206703,206787..207751,208161..208795,208948..209641,209699..210378,211951..212209,212469..212484))	AGAP001381-PA-like protein		with AGAP ID	1	0.000189179
395	ASIC012172	585	KFB44303	ASIC012172 AS2_scf7180000695981 CDS complement(join(213156..213694,213974..214019))	AGAP001381-PA-like protein		with AGAP ID	5	0.00854701
396	ASIC012204	1410	KFB44422	ASIC012204 AS2_scf7180000695983 CDS join(1307811..1307961,1308037..1308481,1308555..1308880,1308954..1309441)	AGAP005317-PA-like protein		with AGAP ID	1	0.00070922
397	ASIC012223	6291	KFB44438	ASIC012223 AS2_scf7180000695983 CDS complement(join(1498806..1499460,1499792..1499964,1500055..1501506,1501567..1501949,1502015..1502234,1502302..1502530,1502592..1502745,1502810..1504374,1504448..1504603,1504680..1505812,1505879..1506049))	AGAP005101-PA-like protein		uncharacterized protein	3	0.000476872
398	ASIC012244	1548	KFB44457	ASIC012244 AS2_scf7180000695983 CDS complement(1660599..1662146)	AGAP005919-PA-like protein		uncharacterized protein	1	0.000645995
399	ASIC012257	642	KFB44469	ASIC012257 AS2_scf7180000695983 CDS complement(1724115..1724756)	hypothetical protein		hypothetical protein	1	0.00155763
400	ASIC012261	3099	KFB44472	ASIC012261 AS2_scf7180000695983 CDS join(1731027..1731140,1732448..1732534,1732609..1734869,1734941..1735477,1740839..1740938)	AGAP005906-PA-like protein		with AGAP ID	1	0.000322685
401	ASIC012265	249	KFB44476	ASIC012265 AS2_scf7180000695983 CDS complement(1771999..1772247)	hypothetical protein		hypothetical protein	1	0.00401606
402	ASIC012276	531	KFB44338	ASIC012276 AS2_scf7180000695983 CDS complement(join(264608..264969,265100..265268))	hypothetical protein		hypothetical protein	1	0.00188324
403	ASIC012345	405	KFB44400	ASIC012345 AS2_scf7180000695983 CDS 1145430..1145834	ATP-dependent DNA helicase		AC2_annotated	1	0.00246914
404	ASIC012353	2244	KFB44407	ASIC012353 AS2_scf7180000695983 CDS complement(join(1173073..1173336,1173471..1173800,1173896..1174040,1174160..1174353,1174444..1174612,1174691..1174863,1174949..1175133,1175191..1175322,1175400..1175562,1175848..1176336))	AGAP005146-PA-like protein		uncharacterized protein	1	0.000445633
405	ASIC012435	16206	KFB44555	ASIC012435 AS2_scf7180000695986 CDS join(223607..223728,223823..223993,225592..225723,225853..226029,226246..226411,236049..236178,236348..239713,239909..240988,241774..241908,242626..242865,242937..243078,243254..244205,244630..245545,245861..246217,246793..246927,247362..248105,248226..248261,249314..249480,249548..249662,249730..250228,250301..250404,250484..250946,251021..251160,251240..25241…	AGAP005471-PA-like protein		uncharacterized protein	1	6.17055e-05
406	ASIC012448	360	KFB44567	ASIC012448 AS2_scf7180000695986 CDS join(347689..347740,348893..349044,349209..349364)	hypothetical protein		hypothetical protein	1	0.00277778
407	ASIC012455	183	KFB44573	ASIC012455 AS2_scf7180000695986 CDS complement(join(408283..408344,408403..408523))	hypothetical protein		hypothetical protein	1	0.00546448
408	ASIC012474	501	KFB44539	ASIC012474 AS2_scf7180000695986 CDS join(35604..35676,35747..36174)	hypothetical protein		hypothetical protein	1	0.00199601
409	ASIC012512	516	KFB44628	ASIC012512 AS2_scf7180000695987 CDS complement(join(337417..337748,337857..338040))	hypothetical protein		hypothetical protein	1	0.00193798
410	ASIC012515	381	KFB44630	ASIC012515 AS2_scf7180000695987 CDS 351719..352099	hypothetical protein		hypothetical protein	1	0.00262467
411	ASIC012541	381	KFB44653	ASIC012541 AS2_scf7180000695987 CDS complement(505322..505702)	biotin synthase		AC2_annotated	1	0.00262467
412	ASIC012581	4557	KFB44675	ASIC012581 AS2_scf7180000695989 CDS complement(15168..19724)	AGAP013081-PA-like protein		uncharacterized protein	1	0.000219443
413	ASIC012664	1683	KFB44762	ASIC012664 AS2_scf7180000695997 CDS join(88013..88204,88316..88557,88726..88902,88986..90057)	AGAP001366-PA-like protein		uncharacterized protein	1	0.000594177
414	ASIC012686	180	KFB44769	ASIC012686 AS2_scf7180000696000 CDS complement(join(17688..17702,17750..17914))	hypothetical protein		hypothetical protein	2	0.0111111
415	ASIC012693	4095	KFB44786	ASIC012693 AS2_scf7180000696001 CDS complement(join(134012..136470,137224..138292,138361..138572,142244..142382,142464..142679))	AGAP011205-PA-like protein		uncharacterized protein	1	0.0002442
416	ASIC012735	948	KFB44825	ASIC012735 AS2_scf7180000696001 CDS join(492020..492632,494048..494382)	AGAP011197-PA-like protein		Immunity	1	0.00105485
417	ASIC012751	1035	KFB44839	ASIC012751 AS2_scf7180000696001 CDS complement(717967..719001)	AGAP011197-PA-like protein		Immunity	1	0.000966184
418	ASIC012780	1689	KFB44869	ASIC012780 AS2_scf7180000696002 CDS complement(join(371255..371395,372669..372910,375042..375264,375362..375460,375533..376428,376707..376794))	hypothetical protein		hypothetical protein	1	0.000592066
419	ASIC012846	483	KFB44928	ASIC012846 AS2_scf7180000696004 CDS complement(join(4233..4587,4724..4851))	fatty acid desaturase		AC2_annotated	2	0.00414079
420	ASIC012848	6570	KFB44937	ASIC012848 AS2_scf7180000696004 CDS join(72135..72391,72501..72683,74804..80672,82128..82388)	hypothetical protein		hypothetical protein	1	0.000152207
421	ASIC012923	1596	KFB44987	ASIC012923 AS2_scf7180000696005 CDS complement(join(428503..429500,429556..430153))	AGAP006048-PA-like protein	CYP4J5	Detoxification	2	0.00125313
422	ASIC012946	4182	KFB45008	ASIC012946 AS2_scf7180000696005 CDS complement(join(754021..754345,755483..758306,758370..759074,759142..759469))	AGAP006062-PA-like protein		uncharacterized protein	1	0.00023912
423	ASIC013011	2664	KFB45092	ASIC013011 AS2_scf7180000696006 CDS join(234974..235326,235394..235810,235874..237767)	AGAP009222-PA-like protein		with AGAP ID	1	0.000375375
424	ASIC013026	1395	KFB45106	ASIC013026 AS2_scf7180000696006 CDS join(393429..393509,395792..396650,399921..400375)	hypothetical protein		hypothetical protein	1	0.000716846
425	ASIC013027	1989	KFB45107	ASIC013027 AS2_scf7180000696006 CDS complement(join(407467..409432,409604..409626))	hypothetical protein		hypothetical protein	1	0.000502765
426	ASIC013068	4638	KFB45232	ASIC013068 AS2_scf7180000696007 CDS complement(join(1048311..1048655,1049779..1050035,1052270..1052339,1053841..1054032,1054101..1054238,1054303..1054734,1054804..1054973,1055042..1055189,1055659..1055913,1055985..1056392,1058238..1058342,1060892..1061036,1067200..1067294,1068171..1068285,1068464..1068645,1068761..1069075,1069328..1069469,1070621..1070712,1075708..1075870,1088529..1088665,1105818…	Nitric oxide synthase		AC2_annotated	1	0.00021561
427	ASIC013074	468	KFB45135	ASIC013074 AS2_scf7180000696007 CDS complement(95527..95994)	hypothetical protein		hypothetical protein	2	0.0042735
428	ASIC013086	1086	KFB45248	ASIC013086 AS2_scf7180000696007 CDS join(1193205..1193264,1193314..1194257,1194337..1194418)	AGAP008272-PA-like protein		with AGAP ID	2	0.00184162
429	ASIC013110	228	KFB45154	ASIC013110 AS2_scf7180000696007 CDS 256721..256948	hypothetical protein		hypothetical protein	1	0.00438596
430	ASIC013128	603	KFB45170	ASIC013128 AS2_scf7180000696007 CDS complement(join(359437..359820,360650..360868))	impaired sucrose induction 1-like protein		AC2_annotated	1	0.00165837
431	ASIC013137	528	KFB45178	ASIC013137 AS2_scf7180000696007 CDS join(443682..443873,443971..444306)	pyridoxine 5'-phosphate synthase		AC2_annotated	1	0.00189394
432	ASIC013165	285	KFB45201	ASIC013165 AS2_scf7180000696007 CDS join(749402..749418,749489..749756)	cysteinyl-tRNA synthetase		AC2_annotated	1	0.00350877
433	ASIC013166	342	KFB45202	ASIC013166 AS2_scf7180000696007 CDS 750655..750996	hypothetical protein		hypothetical protein	1	0.00292398
434	ASIC013175	564	KFB45209	ASIC013175 AS2_scf7180000696007 CDS complement(801366..801929)	threonine-phosphate decarboxylase		AC2_annotated	1	0.00177305
435	ASIC013180	1956	KFB45214	ASIC013180 AS2_scf7180000696007 CDS complement(join(865529..865689,866179..867973))	AGAP008244-PA-like protein		uncharacterized protein	1	0.000511247
436	ASIC013187	240	KFB45262	ASIC013187 AS2_scf7180000696008 CDS complement(join(80960..81181,81273..81290))	ubiquitin carboxyl-terminal hydrolase-like isoform X1		AC2_annotated	1	0.00416667
437	ASIC013200	300	KFB45255	ASIC013200 AS2_scf7180000696008 CDS complement(join(13403..13675,13703..13729))	hypothetical protein		hypothetical protein	2	0.00666667
438	ASIC013249	1782	KFB45303	ASIC013249 AS2_scf7180000696010 CDS complement(297958..299739)	hypothetical protein		hypothetical protein	3	0.0016835
439	ASIC013250	1419	KFB45304	ASIC013250 AS2_scf7180000696010 CDS 300454..301872	hypothetical protein		hypothetical protein	3	0.00211416
440	ASIC013251	5817	KFB45305	ASIC013251 AS2_scf7180000696010 CDS join(305273..305312,305369..306421,306539..307502,307713..308443,308530..308862,308961..310252,310358..310521,315383..316035,316110..316696)	AGAP001523-PA-like protein		uncharacterized protein	2	0.00034382
441	ASIC013260	4974	KFB45313	ASIC013260 AS2_scf7180000696010 CDS complement(join(363403..366134,366838..367552,367632..368034,368119..368468,372764..372954,373075..373611,373711..373756))	AGAP001518-PA-like protein		uncharacterized protein	1	0.000201045
442	ASIC013297	3402	KFB45347	ASIC013297 AS2_scf7180000696010 CDS complement(join(532336..532744,532933..533528,534025..534466,534529..535688,535796..536590))	AGAP001496-PA-like protein		uncharacterized protein	1	0.000293945
443	ASIC013306	3510	KFB45355	ASIC013306 AS2_scf7180000696010 CDS complement(join(628133..628636,629333..631204,631273..631399,632706..632824,632912..633044,633116..633257,633326..633501,633570..633788,633854..634071))	AGAP001752-PA-like protein		with AGAP ID	1	0.0002849
444	ASIC013309	6942	KFB45358	ASIC013309 AS2_scf7180000696010 CDS join(666868..667036,667269..672414,672634..672952,673879..674046,674127..674607,674636..675026,678702..678969)	AGAP001754-PA-like protein		with AGAP ID	1	0.000144051
445	ASIC013324	330	KFB45388	ASIC013324 AS2_scf7180000696011 CDS complement(2485..2814)	AGAP003971-PA-like protein		with AGAP ID	1	0.0030303
446	ASIC013347	1419	KFB45416	ASIC013347 AS2_scf7180000696011 CDS complement(join(270397..270890,271326..272250))	hypothetical protein		hypothetical protein	1	0.000704722
447	ASIC013359	2736	KFB45427	ASIC013359 AS2_scf7180000696011 CDS complement(join(333952..336629,336684..336741))	hypothetical protein		hypothetical protein	1	0.000365497
448	ASIC013481	6408	KFB45535	ASIC013481 AS2_scf7180000696012 CDS complement(join(793990..794484,794564..794795,794860..795193,796150..801496))	nfrkb		AC2_annotated	1	0.000156055
449	ASIC013511	813	KFB45654	ASIC013511 AS2_scf7180000696013 CDS 1096516..1097328	PlyM24		AC2_annotated	1	0.00123001
450	ASIC013517	2367	KFB45562	ASIC013517 AS2_scf7180000696013 CDS join(88295..88555,88623..88830,88891..89261,89339..89901,89966..90007,90074..90995)	zinc finger protein 62-like protein		AC2_annotated	1	0.000422476
451	ASIC013540	255	KFB45680	ASIC013540 AS2_scf7180000696013 CDS complement(1353103..1353357)	hypothetical protein		hypothetical protein	1	0.00392157
452	ASIC013613	6333	KFB45621	ASIC013613 AS2_scf7180000696013 CDS complement(join(815868..817154,817233..817395,817458..817573,817642..819429,819520..819723,821221..822093,822198..822713,822775..823893,823981..824103,824225..824368))	myosin vii		AC2_annotated	2	0.000315806
453	ASIC013619	3534	KFB45627	ASIC013619 AS2_scf7180000696013 CDS complement(join(834883..835089,835202..835326,835460..837539,837613..837908,837983..838126,838204..838333,838396..838766,839096..839276))	histone-lysine n-methyltransferase		AC2_annotated	1	0.000282965
454	ASIC013630	2064	KFB45637	ASIC013630 AS2_scf7180000696013 CDS join(871053..871136,872066..873463,873529..873812,873874..874024,874086..874232)	AGAP007982-PA-like protein	ANCE8	with AGAP ID	1	0.000484496
455	ASIC013693	957	KFB45830	ASIC013693 AS2_scf7180000696015 CDS 513815..514771	hypothetical protein		hypothetical protein	2	0.00208986
456	ASIC013704	2019	KFB45734	ASIC013704 AS2_scf7180000696015 CDS complement(join(139153..140977,142626..142819))	AGAP006883-PA-like protein		uncharacterized protein	1	0.000495295
457	ASIC013711	1095	KFB45740	ASIC013711 AS2_scf7180000696015 CDS complement(join(169296..169322,169579..169647,169712..170710))	AGAP006874-PA-like protein	Gr29	with AGAP ID	2	0.00182648
458	ASIC013800	372	KFB45845	ASIC013800 AS2_scf7180000696016 CDS complement(join(79662..79930,80003..80105))	AGAP013493-PA-like protein		uncharacterized protein	1	0.00268817
459	ASIC013826	1095	KFB45838	ASIC013826 AS2_scf7180000696016 CDS complement(join(11209..11239,11313..11365,11604..11698,11803..12522,12628..12823))	AGAP013062-PA-like protein		uncharacterized protein	1	0.000913242
460	ASIC013881	276	KFB45918	ASIC013881 AS2_scf7180000696018 CDS complement(join(117549..117627,117984..118180))	hypothetical protein		hypothetical protein	1	0.00362319
461	ASIC013915	2886	KFB45949	ASIC013915 AS2_scf7180000696018 CDS complement(join(401088..402980,403124..403264,403289..403487,403581..403955,405603..405880))	hypothetical protein		hypothetical protein	1	0.0003465
462	ASIC013951	753	KFB45986	ASIC013951 AS2_scf7180000696020 CDS join(149892..149938,150093..150384,150427..150840)	rhinoceros, isoform B		AC2_annotated	4	0.00531208
463	ASIC013955	2178	KFB45989	ASIC013955 AS2_scf7180000696020 CDS join(171137..171255,171781..172057,172133..173017,173374..173614,173742..173890,176134..176305,178190..178330,185726..185919)	AGAP002674-PA-like protein		with AGAP ID	1	0.000459137
464	ASIC014018	858	KFB46045	ASIC014018 AS2_scf7180000696020 CDS complement(join(609918..610362,611072..611484))	hypothetical protein		hypothetical protein	1	0.0011655
465	ASIC014050	2562	KFB46075	ASIC014050 AS2_scf7180000696022 CDS join(230914..230998,231160..231344,231416..233707)	AGAP003865-PA-like protein		with AGAP ID	1	0.00039032
466	ASIC014071	2562	KFB46094	ASIC014071 AS2_scf7180000696022 CDS complement(join(302325..302854,302928..303153,303356..303999,304067..304190,304638..305095,305154..305733))	AGAP002839-PA-like protein		with AGAP ID	1	0.00039032
467	ASIC014180	4077	KFB46178	ASIC014180 AS2_scf7180000696023 CDS complement(join(479596..479725,479811..479902,479964..480724,481582..483061,483138..484456,484519..484641,484927..485098))	DNA-directed RNA polymerase		AC2_annotated	1	0.000245278
468	ASIC014202	2337	KFB46198	ASIC014202 AS2_scf7180000696023 CDS complement(join(748846..748984,749083..749357,749389..749440,749519..749593,749655..749806,749991..751634))	AGAP007772-PA-like protein		uncharacterized protein	1	0.000427899
469	ASIC014212	4569	KFB46136	ASIC014212 AS2_scf7180000696023 CDS complement(join(53602..53946,54014..54139,54227..58267,58354..58410))	hypothetical protein		hypothetical protein	7	0.00153206
470	ASIC014226	1389	KFB46220	ASIC014226 AS2_scf7180000696023 CDS join(989665..990284,992364..992780,994241..994364,994439..994510,994570..994659,994730..994795)	AGAP007757-PA-like protein	Gr45	with AGAP ID	1	0.000719942
471	ASIC014298	1647	KFB46309	ASIC014298 AS2_scf7180000696024 CDS complement(462099..463745)	AGAP004621-PA-like protein		uncharacterized protein	1	0.000607165
472	ASIC014307	2454	KFB46256	ASIC014307 AS2_scf7180000696024 CDS join(34892..35495,35576..35776,35864..36121,36214..36406,37702..37969,38035..38277,38347..39033)	hypothetical protein		hypothetical protein	2	0.000814996
473	ASIC014313	1797	KFB46322	ASIC014313 AS2_scf7180000696024 CDS join(511861..511888,511967..513735)	sulfate transporter		AC2_annotated	1	0.000556483
474	ASIC014345	867	KFB46451	ASIC014345 AS2_scf7180000696025 CDS join(709185..709582,709732..710025,710091..710159,710218..710323)	AGAP008114-PA-like protein	Or22	odorant protein	1	0.0011534
475	ASIC014362	2280	KFB46354	ASIC014362 AS2_scf7180000696025 CDS complement(join(4633..6134,6819..7038,7183..7382,7466..7624,7710..7849,7951..8009))	mediator complex, subunit, putative		AC2_annotated	1	0.000438596
476	ASIC014374	1542	KFB46380	ASIC014374 AS2_scf7180000696025 CDS join(250641..250668,250734..251592,251663..252317)	AGAP008164-PA-like protein		with AGAP ID	1	0.000648508
477	ASIC014405	207	KFB46408	ASIC014405 AS2_scf7180000696025 CDS join(398072..398183,398243..398337)	glycoside hydrolase family 18 protein		AC2_annotated	1	0.00483092
478	ASIC014407	1590	KFB46409	ASIC014407 AS2_scf7180000696025 CDS join(399232..399366,399432..400691,400758..400952)	AGAP008146-PA-like protein		uncharacterized protein	2	0.00125786
479	ASIC014415	2943	KFB46417	ASIC014415 AS2_scf7180000696025 CDS join(452977..454239,454319..454578,455339..456557,456643..456843)	hypothetical protein		hypothetical protein	1	0.000339789
480	ASIC014435	525	KFB46435	ASIC014435 AS2_scf7180000696025 CDS 591949..592473	hypothetical protein		hypothetical protein	1	0.00190476
481	ASIC014448	7026	KFB46447	ASIC014448 AS2_scf7180000696025 CDS complement(join(666205..667412,667491..668456,669700..670425,670493..672268,672335..672871,672936..673461,673497..674032,674126..674461,675537..675737,675815..676028))	AGAP008117-PA-like protein		uncharacterized protein	3	0.000426985
482	ASIC014495	9654	KFB46504	ASIC014495 AS2_scf7180000696026 CDS complement(join(645090..648530,651745..652431,659999..660526,660608..660802,663546..663713,665466..666677,666754..666879,672197..672361,672760..672903,672972..675938,676171..676191))	AGAP010655-PA-like protein		uncharacterized protein	1	0.000103584
483	ASIC014611	1341	KFB46574	ASIC014611 AS2_scf7180000696027 CDS complement(426946..428286)	AGAP009904-PA-like protein		with AGAP ID	1	0.000745712
484	ASIC014619	2088	KFB46581	ASIC014619 AS2_scf7180000696027 CDS join(447412..449406,449473..449565)	AGAP009911-PA-like protein		uncharacterized protein	2	0.000957854
485	ASIC014628	231	KFB46589	ASIC014628 AS2_scf7180000696027 CDS 534322..534552	hypothetical protein		hypothetical protein	1	0.004329
486	ASIC014635	1665	KFB46595	ASIC014635 AS2_scf7180000696027 CDS complement(join(554626..555152,555221..555724,555783..556032,556097..556330,556444..556546,556695..556741))	AGAP009924-PA-like protein		uncharacterized protein	1	0.000600601
487	ASIC014647	2055	KFB46606	ASIC014647 AS2_scf7180000696027 CDS join(643852..644264,644359..646000)	hypothetical protein		hypothetical protein	1	0.000486618
488	ASIC014679	210	KFB46684	ASIC014679 AS2_scf7180000696028 CDS complement(join(87229..87256,87346..87527))	pyrimidine reductase, riboflavin biosynthesis		AC2_annotated	1	0.0047619
489	ASIC014687	1347	KFB46692	ASIC014687 AS2_scf7180000696028 CDS join(149492..150619,150683..150901)	hypothetical protein		hypothetical protein	2	0.00148478
490	ASIC014690	1281	KFB46694	ASIC014690 AS2_scf7180000696028 CDS complement(join(156082..156471,156555..157265,157395..157574))	AGAP003082-PB-like protein		with AGAP ID	3	0.00234192
491	ASIC014745	2721	KFB46741	ASIC014745 AS2_scf7180000696028 CDS join(471564..471683,471755..473642,473718..473848,473914..474014,474080..474560)	AGAP013463-PA-like protein		uncharacterized protein	1	0.000367512
492	ASIC014796	939	KFB46791	ASIC014796 AS2_scf7180000696029 CDS complement(join(450829..450983,451085..451487,452868..453173,453458..453532))	hypothetical protein	IR76b	hypothetical protein	2	0.00212993
493	ASIC014813	2340	KFB46807	ASIC014813 AS2_scf7180000696029 CDS complement(join(555191..557235,557330..557521,557578..557680))	AGAP011974-PA-like protein	SCRC1	with AGAP ID	1	0.00042735
494	ASIC014832	1929	KFB46830	ASIC014832 AS2_scf7180000696030 CDS join(167071..168922,169760..169812,169885..169908)	AGAP002274-PA-like protein		uncharacterized protein	1	0.000518403
495	ASIC014856	3534	KFB46852	ASIC014856 AS2_scf7180000696030 CDS join(312656..312865,313265..316099,316424..316669,316763..317005)	AGAP002290-PA-like protein		with AGAP ID	1	0.000282965
496	ASIC014887	249	KFB46882	ASIC014887 AS2_scf7180000696031 CDS complement(join(172505..172607,172676..172821))	Dgri\GH22342-PA-like protein		AC2_annotated	1	0.00401606
497	ASIC015042	3270	KFB47026	ASIC015042 AS2_scf7180000696034 CDS complement(join(489535..489564,489629..489839,490033..490205,490272..492818,492897..493205))	AGAP007022-PA-like protein		uncharacterized protein	1	0.00030581
498	ASIC015050	1449	KFB47033	ASIC015050 AS2_scf7180000696034 CDS join(549200..549287,552338..552502,552588..552783,553738..554737)	AGAP005634-PA-like protein		with AGAP ID	1	0.000690131
499	ASIC015093	1278	KFB47162	ASIC015093 AS2_scf7180000696035 CDS complement(join(978088..978147,978225..978613,978654..978876,978978..979191,979283..979674))	AGAP000159-PA-like protein		with AGAP ID	2	0.00156495
500	ASIC015140	2505	KFB47094	ASIC015140 AS2_scf7180000696035 CDS complement(join(393261..393778,393869..394382,396352..396821,396959..397270,397342..397558,397632..397962,398043..398185))	circadian locomoter output cycles kaput protein (dclock) (dpas1)	CLK	AC2_annotated	1	0.000399202
501	ASIC015257	2715	KFB47231	ASIC015257 AS2_scf7180000696037 CDS join(451882..451942,452020..452206,453338..453634,453713..454840,454906..455045,455138..455397,455466..456107)	hypothetical protein		hypothetical protein	1	0.000368324
502	ASIC015363	1479	KFB47421	ASIC015363 AS2_scf7180000696039 CDS complement(join(1355507..1355541,1355607..1357017,1357476..1357508))	hypothetical protein		hypothetical protein	2	0.00135227
503	ASIC015395	11706	KFB47448	ASIC015395 AS2_scf7180000696039 CDS complement(join(1707943..1708037,1710337..1719041,1720421..1721311,1721518..1721738,1721895..1723172,1723389..1723820,1724538..1724621))	AGAP012236-PA-like protein		uncharacterized protein	2	0.000170853
504	ASIC015401	996	KFB47454	ASIC015401 AS2_scf7180000696039 CDS join(1758877..1759231,1759293..1759933)	AGAP012231-PA-like protein		uncharacterized protein	1	0.00100402
505	ASIC015402	1515	KFB47455	ASIC015402 AS2_scf7180000696039 CDS complement(join(1762362..1762373,1762456..1763958))	AGAP012230-PA-like protein		with AGAP ID	2	0.00132013
506	ASIC015436	5661	KFB47484	ASIC015436 AS2_scf7180000696039 CDS join(2043868..2046654,2049938..2052811)	AGAP012340-PA-like protein		uncharacterized protein	1	0.000176647
507	ASIC015467	198	KFB47511	ASIC015467 AS2_scf7180000696039 CDS 2426583..2426780	multidrug ABC transporter ATP-binding protein		AC2_annotated	1	0.00505051
508	ASIC015471	300	KFB47342	ASIC015471 AS2_scf7180000696039 CDS 291708..292007	hypothetical protein		hypothetical protein	1	0.00333333
509	ASIC015496	231	KFB47535	ASIC015496 AS2_scf7180000696039 CDS 2622799..2623029	hypothetical protein		hypothetical protein	1	0.004329
510	ASIC015501	822	KFB47539	ASIC015501 AS2_scf7180000696039 CDS join(2633858..2634289,2634354..2634743)	AGAP011457-PA-like protein		with AGAP ID	1	0.00121655
511	ASIC015521	11697	KFB47557	ASIC015521 AS2_scf7180000696039 CDS complement(join(2813158..2813352,2813434..2814555,2814585..2819312,2819380..2819613,2819685..2822927,2822988..2823168,2823236..2823645,2823706..2825136,2825202..2825354))	AGAP011441-PA-like protein		with AGAP ID	1	8.5492e-05
512	ASIC015560	2109	KFB47591	ASIC015560 AS2_scf7180000696039 CDS complement(join(3137503..3137694,3138294..3138455,3138534..3140274,3140354..3140367))	protein regulator of cytokinesis 1 prc1		AC2_annotated	1	0.000474158
513	ASIC015606	1080	KFB47363	ASIC015606 AS2_scf7180000696039 CDS complement(join(516798..517288,517512..517606,517665..517814,517881..518085,518160..518243,518306..518360))	hypothetical protein	CLIPE4	hypothetical protein	2	0.00185185
514	ASIC015636	234	KFB47390	ASIC015636 AS2_scf7180000696039 CDS 935967..936200	hypothetical protein		hypothetical protein	1	0.0042735
515	ASIC015637	1374	KFB47329	ASIC015637 AS2_scf7180000696039 CDS 120139..121512	hypothetical protein		hypothetical protein	1	0.000727802
516	ASIC015673	396	KFB47632	ASIC015673 AS2_scf7180000696040 CDS join(142254..142440,142523..142731)	glycosyl hydrolase family 31		AC2_annotated	1	0.00252525
517	ASIC015787	1197	KFB47722	ASIC015787 AS2_scf7180000696041 CDS join(223668..223701,224423..224887,224949..225646)	AGAP009128-PA-like protein		with AGAP ID	1	0.000835422
518	ASIC015795	1524	KFB47729	ASIC015795 AS2_scf7180000696041 CDS join(253758..253780,253851..254429,254517..254829,254891..255499)	hypothetical protein		hypothetical protein	1	0.000656168
519	ASIC015818	288	KFB47750	ASIC015818 AS2_scf7180000696041 CDS join(565194..565345,565641..565776)	hypothetical protein ORF012		AC2_annotated	1	0.00347222
520	ASIC015826	1602	KFB47757	ASIC015826 AS2_scf7180000696041 CDS join(638380..639439,644052..644271,644373..644694)	AGAP009137-PA-like protein		with AGAP ID	1	0.00062422
521	ASIC015859	1557	KFB47786	ASIC015859 AS2_scf7180000696041 CDS join(1061616..1061630,1061681..1061794,1061839..1062426,1062528..1063292,1063357..1063431)	AGAP009144-PA-like protein		uncharacterized protein	1	0.000642261
522	ASIC015872	3930	KFB47798	ASIC015872 AS2_scf7180000696041 CDS join(1243347..1244258,1244322..1245402,1245482..1246404,1246469..1246630,1246721..1246999,1250461..1251033)	AGAP009150-PA-like protein		with AGAP ID	2	0.000508906
523	ASIC015873	2025	KFB47799	ASIC015873 AS2_scf7180000696041 CDS complement(join(1252049..1253323,1253402..1253640,1253710..1254220))	hypothetical protein		hypothetical protein	1	0.000493827
524	ASIC015883	831	KFB47837	ASIC015883 AS2_scf7180000696042 CDS complement(join(299497..299714,300124..300736))	hypothetical protein		hypothetical protein	1	0.00120337
525	ASIC015887	1269	KFB47825	ASIC015887 AS2_scf7180000696042 CDS join(11392..11416,11493..12716,12824..12843)	AGAP010352-PA-like protein		with AGAP ID	1	0.000788022
526	ASIC015944	378	KFB47888	ASIC015944 AS2_scf7180000696043 CDS complement(join(396369..396703,397462..397504))	AGC/AKT protein kinase		AC2_annotated	1	0.0026455
527	ASIC015963	399	KFB47905	ASIC015963 AS2_scf7180000696043 CDS 638211..638609	phage integrase site specific recombinase		AC2_annotated	1	0.00250627
528	ASIC015965	381	KFB47907	ASIC015965 AS2_scf7180000696043 CDS 662154..662534	outer membrane lipoprotein carrier protein LolA		AC2_annotated	1	0.00262467
529	ASIC015999	3954	KFB47937	ASIC015999 AS2_scf7180000696043 CDS join(1068062..1069429,1069580..1071300,1071397..1071888,1076746..1077118)	hypothetical protein		hypothetical protein	1	0.000252908
530	ASIC016037	1833	KFB48067	ASIC016037 AS2_scf7180000696045 CDS complement(946253..948085)	hypothetical protein		hypothetical protein	3	0.00163666
531	ASIC016070	2523	KFB48096	ASIC016070 AS2_scf7180000696045 CDS complement(1245827..1248349)	AGAP003703-PA-like protein		with AGAP ID	1	0.000396354
532	ASIC016086	183	KFB48110	ASIC016086 AS2_scf7180000696045 CDS 1369938..1370120	monogalactosyldiacylglycerol synthase		AC2_annotated	2	0.010929
533	ASIC016087	588	KFB48111	ASIC016087 AS2_scf7180000696045 CDS complement(1372427..1373014)	Trim46 protein		AC2_annotated	1	0.00170068
534	ASIC016146	4965	KFB48028	ASIC016146 AS2_scf7180000696045 CDS complement(join(597757..597824,597912..597996,598955..599101,599163..599504,603168..606745,609682..609808,609973..610110,617914..618056,618359..618517,620715..620892))	hypothetical protein		hypothetical protein	2	0.00040282
535	ASIC016180	186	KFB48057	ASIC016180 AS2_scf7180000696045 CDS 845847..846032	hypothetical protein		hypothetical protein	1	0.00537634
536	ASIC016215	321	KFB48151	ASIC016215 AS2_scf7180000696046 CDS complement(397407..397727)	hypothetical protein		hypothetical protein	1	0.00311526
537	ASIC016268	369	KFB48291	ASIC016268 AS2_scf7180000696047 CDS join(1353408..1353645,1353829..1353959)	hypothetical protein		hypothetical protein	1	0.00271003
538	ASIC016359	3555	KFB48238	ASIC016359 AS2_scf7180000696047 CDS complement(join(451802..451893,451968..452211,452833..454179,454258..454786,456014..456321,456392..456593,456658..456946,468312..468480,496412..496786))	AGAP005816-PA-like protein		with AGAP ID	2	0.000562588
539	ASIC016365	588	KFB48243	ASIC016365 AS2_scf7180000696047 CDS complement(join(585257..585564,585628..585907))	hypothetical protein		hypothetical protein	1	0.00170068
540	ASIC016386	2541	KFB48261	ASIC016386 AS2_scf7180000696047 CDS complement(join(738217..738227,738459..740988))	AGAP005808-PA-like protein		uncharacterized protein	2	0.000787092
541	ASIC016392	321	KFB48267	ASIC016392 AS2_scf7180000696047 CDS complement(849386..849706)	hypothetical protein		hypothetical protein	1	0.00311526
542	ASIC016397	1545	KFB48271	ASIC016397 AS2_scf7180000696047 CDS join(909660..910052,910108..910547,910620..911034,911114..911281,911349..911477)	AGAP005805-PA-like protein		uncharacterized protein	2	0.0012945
543	ASIC016445	384	KFB48461	ASIC016445 AS2_scf7180000696048 CDS complement(join(1247649..1247790,1247851..1248092))	hypothetical protein		hypothetical protein	1	0.00260417
544	ASIC016469	357	KFB48483	ASIC016469 AS2_scf7180000696048 CDS join(1639763..1639858,1639901..1640161)	hypothetical protein		hypothetical protein	1	0.00280112
545	ASIC016483	555	KFB48363	ASIC016483 AS2_scf7180000696048 CDS complement(join(226646..226810,226880..227195,227259..227332))	AGAP005019-PA-like protein		uncharacterized protein	1	0.0018018
546	ASIC016524	864	KFB48400	ASIC016524 AS2_scf7180000696048 CDS join(777679..778409,778494..778626)	AGAP012651-PA-like protein		with AGAP ID	1	0.00115741
547	ASIC016536	165	KFB48411	ASIC016536 AS2_scf7180000696048 CDS 877938..878102	hypothetical protein		hypothetical protein	1	0.00606061
548	ASIC016547	789	KFB48421	ASIC016547 AS2_scf7180000696048 CDS complement(join(992130..992906,992974..992985))	AGAP004988-PA-like protein		uncharacterized protein	1	0.00126743
549	ASIC016551	1044	KFB48425	ASIC016551 AS2_scf7180000696048 CDS complement(join(999499..1000519,1000590..1000612))	AGAP004984-PA-like protein		uncharacterized protein	1	0.000957854
550	ASIC016569	3600	KFB48583	ASIC016569 AS2_scf7180000696049 CDS join(729609..730346,730423..730767,730894..730973,731147..731499,731563..731697,732914..733053,733131..733274,733331..734161,738019..738212,738284..738773,738847..738949,739017..739063)	hypothetical protein		hypothetical protein	1	0.000277778
551	ASIC016570	4044	KFB48584	ASIC016570 AS2_scf7180000696049 CDS complement(join(739532..739828,739908..740240,740301..740451,740523..740885,740950..741119,741187..741383,741469..741603,741693..741858,742411..742549,745992..746085,746150..746264,746337..746479,746566..746752,747018..747168,747323..747516,747847..748015,748094..748263,749241..749443,749608..749787,749884..750088,750234..750515))	AGAP007079-PA-like protein		uncharacterized protein	1	0.00024728
552	ASIC016579	258	KFB48592	ASIC016579 AS2_scf7180000696049 CDS join(807662..807711,807783..807990)	outer membrane protein		AC2_annotated	1	0.00387597
553	ASIC016596	324	KFB48608	ASIC016596 AS2_scf7180000696049 CDS 987261..987584	mediator of RNA polymerase II transcription subunit, putative		AC2_annotated	4	0.0123457
554	ASIC016597	3894	KFB48609	ASIC016597 AS2_scf7180000696049 CDS complement(join(991116..991248,992725..993266,993576..993798,995085..996062,997228..999232,999327..999339))	hypothetical protein		hypothetical protein	1	0.000256805
555	ASIC016600	3660	KFB48497	ASIC016600 AS2_scf7180000696049 CDS join(105034..105042,105107..107443,107525..108296,108880..109058,109143..109505)	AGAP003182-PA-like protein		with AGAP ID	1	0.000273224
556	ASIC016633	3699	KFB48500	ASIC016633 AS2_scf7180000696049 CDS join(122116..122409,122476..125007,125061..125144,125290..126078)	hypothetical protein		hypothetical protein	2	0.000540687
557	ASIC016685	981	KFB48686	ASIC016685 AS2_scf7180000696049 CDS complement(1981296..1982276)	AGAP006164-PA-like protein		with AGAP ID	1	0.00101937
558	ASIC016712	507	KFB48710	ASIC016712 AS2_scf7180000696049 CDS complement(join(2155294..2155512,2155584..2155723,2155828..2155975))	AGAP007210-PA-like protein		uncharacterized protein	1	0.00197239
559	ASIC016713	1020	KFB48711	ASIC016713 AS2_scf7180000696049 CDS join(2166271..2166395,2166458..2166676,2166753..2167428)	hypothetical protein		hypothetical protein	1	0.000980392
560	ASIC016724	3540	KFB48721	ASIC016724 AS2_scf7180000696049 CDS join(2189591..2189733,2194122..2197518)	hypothetical protein		hypothetical protein	1	0.000282486
561	ASIC016805	789	KFB48794	ASIC016805 AS2_scf7180000696049 CDS 2663624..2664412	hypothetical protein		hypothetical protein	1	0.00126743
562	ASIC016813	2724	KFB48801	ASIC016813 AS2_scf7180000696049 CDS join(2680775..2680890,2681002..2682623,2682716..2683164,2683447..2683961,2684050..2684071)	AGAP007582-PA-like protein		uncharacterized protein	1	0.000367107
563	ASIC016828	2862	KFB48520	ASIC016828 AS2_scf7180000696049 CDS join(288157..288312,288632..288710,289969..290175,290242..291363,291950..292026,293244..293590,293653..294375,294450..294600)	aspartyl/asparaginyl beta-hydroxylase		AC2_annotated	1	0.000349406
564	ASIC016833	1743	KFB48524	ASIC016833 AS2_scf7180000696049 CDS complement(join(315243..315435,315500..315792,316025..317065,317141..317356))	AGAP005837-PA-like protein	COEJHE5E	Detoxification	2	0.00114745
565	ASIC016839	5058	KFB48530	ASIC016839 AS2_scf7180000696049 CDS join(401894..403232,403404..404717,404794..405073,405135..405258,407461..408330,409777..410063,410290..410471,412761..413221,413295..413495)	hypothetical protein		hypothetical protein	1	0.000197707
566	ASIC016864	2100	KFB48491	ASIC016864 AS2_scf7180000696049 CDS join(52856..52984,53075..53320,53404..53783,53920..54338,54887..55812)	AGAP003179-PA-like protein		with AGAP ID	1	0.00047619
567	ASIC016872	729	KFB48560	ASIC016872 AS2_scf7180000696049 CDS 592440..593168	hypothetical protein		hypothetical protein	1	0.00137174
568	ASIC016875	1245	KFB48492	ASIC016875 AS2_scf7180000696049 CDS complement(join(58262..58516,58604..58699,58799..59049,59113..59278,60658..61134))	AGAP003180-PA-like protein		with AGAP ID	3	0.00240964
569	ASIC016905	678	KFB48911	ASIC016905 AS2_scf7180000696050 CDS join(839474..839587,839824..840004,840071..840453)	tRNA pseudouridine synthase D		AC2_annotated	1	0.00147493
570	ASIC016960	1719	KFB48959	ASIC016960 AS2_scf7180000696050 CDS join(1235245..1235291,1235409..1235890,1236391..1236447,1236537..1236586,1238819..1239004,1239074..1239266,1239366..1239494,1245286..1245405,1251413..1251583,1255559..1255629,1257617..1257829)	hypothetical protein		hypothetical protein	1	0.000581734
571	ASIC016967	1191	KFB48965	ASIC016967 AS2_scf7180000696050 CDS join(1306031..1306186,1306256..1306470,1306538..1306981,1307047..1307269,1307353..1307505)	AGAP000499-PA-like protein		uncharacterized protein	1	0.000839631
572	ASIC017021	576	KFB49012	ASIC017021 AS2_scf7180000696050 CDS complement(join(1675179..1675497,1677895..1678151))	hypothetical protein		hypothetical protein	1	0.00173611
573	ASIC017045	2064	KFB49034	ASIC017045 AS2_scf7180000696050 CDS complement(join(1942262..1942858,1942924..1944157,1944234..1944466))	hypothetical protein		hypothetical protein	1	0.000484496
574	ASIC017071	5496	KFB49058	ASIC017071 AS2_scf7180000696050 CDS complement(join(2229998..2231205,2232461..2233210,2233760..2234004,2235463..2238755))	hypothetical protein		hypothetical protein	2	0.000363901
575	ASIC017072	4308	KFB49059	ASIC017072 AS2_scf7180000696050 CDS 2240729..2245036	AGAP007989-PA-like protein		uncharacterized protein	2	0.000464253
576	ASIC017077	1641	KFB49063	ASIC017077 AS2_scf7180000696050 CDS complement(join(2294888..2295036,2295117..2296203,2302846..2302935,2303101..2303415))	AGAP000901-PA-like protein		with AGAP ID	1	0.000609385
577	ASIC017183	777	KFB49086	ASIC017183 AS2_scf7180000696051 CDS complement(90474..91250)	hypothetical protein		hypothetical protein	2	0.002574
578	ASIC017188	4305	KFB49188	ASIC017188 AS2_scf7180000696051 CDS join(1042403..1045133,1045197..1045489,1045553..1046041,1046110..1046597,1046663..1046966)	hypothetical protein		hypothetical protein	1	0.000232288
579	ASIC017193	1287	KFB49193	ASIC017193 AS2_scf7180000696051 CDS join(1085901..1086095,1086179..1086288,1086459..1087440)	AGAP009807-PA-like protein		with AGAP ID	1	0.000777001
580	ASIC017261	1509	KFB49109	ASIC017261 AS2_scf7180000696051 CDS complement(join(222781..222857,222922..223357,223428..223641,224060..224631,224701..224910))	AGAP008627-PA-like protein		uncharacterized protein	1	0.000662691
581	ASIC017299	2268	KFB49144	ASIC017299 AS2_scf7180000696051 CDS complement(join(532242..532663,532908..533092,534625..534733,535048..535487,536794..536920,539517..540002,540395..540507,540610..540676,541545..541657,543440..543577,547273..547340))	AGAP009263-PA-like protein	CLIPB16	Immunity	1	0.000440917
582	ASIC017361	1116	KFB49252	ASIC017361 AS2_scf7180000696052 CDS 203529..204644	hypothetical protein		hypothetical protein	2	0.00179211
583	ASIC017372	504	KFB49262	ASIC017372 AS2_scf7180000696052 CDS complement(join(275255..275611,275697..275843))	helicase protein		AC2_annotated	2	0.00396825
584	ASIC017377	171	KFB49265	ASIC017377 AS2_scf7180000696052 CDS complement(293474..293644)	hypothetical protein		hypothetical protein	1	0.00584795
585	ASIC017424	1161	KFB49308	ASIC017424 AS2_scf7180000696052 CDS join(582178..582498,583768..584607)	AGAP006497-PA-like protein	CPR134	Cuticular protein	1	0.000861326
586	ASIC017454	669	KFB49449	ASIC017454 AS2_scf7180000696053 CDS complement(1536556..1537224)	AGAP009528-PA-like protein		uncharacterized protein	1	0.00149477
587	ASIC017507	294	KFB49406	ASIC017507 AS2_scf7180000696053 CDS complement(948964..949257)	hypothetical protein		hypothetical protein	1	0.00340136
588	ASIC017533	2664	KFB49358	ASIC017533 AS2_scf7180000696053 CDS join(82288..82308,82400..82497,82601..84113,85755..85896,87190..87294,93325..93739,102058..102283,102356..102499)	hypothetical protein		hypothetical protein	1	0.000375375
589	ASIC017537	1227	KFB49433	ASIC017537 AS2_scf7180000696053 CDS 1369533..1370759	AGAP011616-PA-like protein		uncharacterized protein	1	0.000814996
590	ASIC017556	366	KFB49462	ASIC017556 AS2_scf7180000696054 CDS complement(49691..50056)	hypothetical protein		hypothetical protein	1	0.00273224
591	ASIC017572	3285	KFB49564	ASIC017572 AS2_scf7180000696054 CDS complement(join(1225905..1226703,1226780..1227142,1227435..1228548,1228789..1229122,1229258..1229442,1243117..1243606))	AGAP008384-PA-like protein		uncharacterized protein	1	0.000304414
592	ASIC017578	279	KFB49464	ASIC017578 AS2_scf7180000696054 CDS join(111349..111385,112174..112349,112575..112640)	AGAP008101-PA-like protein		with AGAP ID	1	0.00358423
593	ASIC017610	960	KFB49597	ASIC017610 AS2_scf7180000696054 CDS complement(join(1588068..1588114,1588141..1588922,1588989..1589119))	zinc finger protein		AC2_annotated	1	0.00104167
594	ASIC017628	1476	KFB49613	ASIC017628 AS2_scf7180000696054 CDS complement(join(1718000..1718840,1719622..1720256))	AGAP007959-PA-like protein		uncharacterized protein	1	0.000677507
595	ASIC017639	321	KFB49623	ASIC017639 AS2_scf7180000696054 CDS complement(1801717..1802037)	hypothetical protein		hypothetical protein	1	0.00311526
596	ASIC017673	1002	KFB49473	ASIC017673 AS2_scf7180000696054 CDS join(195597..195611,195742..196606,196657..196778)	AGAP008098-PA-like protein		uncharacterized protein	1	0.000998004
597	ASIC017714	4368	KFB49511	ASIC017714 AS2_scf7180000696054 CDS join(529225..529908,530762..531373,531818..532675,532951..533700,534713..535282,535796..536614,536649..536723)	hypothetical protein	Gr44	hypothetical protein	2	0.000457875
598	ASIC017717	1407	KFB49513	ASIC017717 AS2_scf7180000696054 CDS join(541407..541937,542312..543187)	AGAP009256-PE-like protein	Gr44	with AGAP ID	1	0.000710732
599	ASIC017722	597	KFB49518	ASIC017722 AS2_scf7180000696054 CDS 558841..559437	hypothetical protein		hypothetical protein	1	0.00167504
600	ASIC017730	246	KFB49525	ASIC017730 AS2_scf7180000696054 CDS 692169..692414	hypothetical protein		hypothetical protein	1	0.00406504
601	ASIC017793	441	KFB49664	ASIC017793 AS2_scf7180000696055 CDS 54553..54993	membrane protein		AC2_annotated	1	0.00226757
602	ASIC017800	402	KFB49784	ASIC017800 AS2_scf7180000696055 CDS complement(join(1320695..1320733,1321418..1321614,1321653..1321818))	AGAP012303-PA-like protein		uncharacterized protein	1	0.00248756
603	ASIC017807	465	KFB49790	ASIC017807 AS2_scf7180000696055 CDS complement(1377518..1377982)	hypothetical protein		hypothetical protein	1	0.00215054
604	ASIC017824	1626	KFB49806	ASIC017824 AS2_scf7180000696055 CDS complement(join(1464872..1466285,1466374..1466585))	AGAP012292-PA-like protein	CYP9J4	Detoxification	1	0.000615006
605	ASIC017859	375	KFB49670	ASIC017859 AS2_scf7180000696055 CDS complement(join(113788..114097,114207..114271))	Zinc finger, C2H2 type family protein		AC2_annotated	1	0.00266667
606	ASIC017864	1701	KFB49842	ASIC017864 AS2_scf7180000696055 CDS join(1773736..1775269,1775319..1775485)	hypothetical protein		hypothetical protein	1	0.000587889
607	ASIC017868	2709	KFB49846	ASIC017868 AS2_scf7180000696055 CDS join(1801693..1801769,1803739..1803883,1803964..1804090,1804165..1804291,1804355..1804533,1804999..1805245,1805375..1806100,1806221..1806512,1806594..1806783,1806916..1807514)	hypothetical protein		hypothetical protein	1	0.00036914
608	ASIC017885	1638	KFB49860	ASIC017885 AS2_scf7180000696055 CDS complement(join(1873537..1874626,1874689..1875236))	AGAP008545-PA-like protein		uncharacterized protein	1	0.000610501
609	ASIC017912	1722	KFB49884	ASIC017912 AS2_scf7180000696055 CDS join(2215474..2215603,2217855..2218991,2219074..2219528)	AGAP010596-PA-like protein		with AGAP ID	1	0.00058072
610	ASIC017915	1554	KFB49675	ASIC017915 AS2_scf7180000696055 CDS complement(289071..290624)	ubiquitin carboxyl-terminal hydrolase 16-like protein		AC2_annotated	1	0.000643501
611	ASIC017965	1035	KFB49932	ASIC017965 AS2_scf7180000696055 CDS 2861904..2862938	AGAP011402-PA-like protein		with AGAP ID	2	0.00193237
612	ASIC018019	1029	KFB49980	ASIC018019 AS2_scf7180000696055 CDS complement(join(3300482..3300826,3300890..3301296,3301370..3301646))	nucleoporin Nup43		AC2_annotated	1	0.000971817
613	ASIC018073	1929	KFB50029	ASIC018073 AS2_scf7180000696055 CDS join(3582878..3583105,3583170..3584366,3584435..3584638,3584719..3585018)	hypothetical protein		hypothetical protein	1	0.000518403
614	ASIC018142	2253	KFB50090	ASIC018142 AS2_scf7180000696055 CDS complement(join(4005572..4005979,4006055..4007899))	AGAP011880-PA-like protein		with AGAP ID	1	0.000443853
615	ASIC018179	1632	KFB50123	ASIC018179 AS2_scf7180000696055 CDS join(4436992..4438325,4438387..4438684)	hypothetical protein		hypothetical protein	4	0.00245098
616	ASIC018222	363	KFB50160	ASIC018222 AS2_scf7180000696055 CDS 4739471..4739833	phosphatidylinositol-4-phosphate 5-kinase fab1		AC2_annotated	1	0.00275482
617	ASIC018251	273	KFB50186	ASIC018251 AS2_scf7180000696055 CDS 4914493..4914765	hypothetical protein		hypothetical protein	1	0.003663
618	ASIC018289	273	KFB50219	ASIC018289 AS2_scf7180000696055 CDS complement(join(5287589..5287702,5287768..5287896,5289273..5289302))	hypothetical protein		hypothetical protein	1	0.003663
619	ASIC018291	6282	KFB50221	ASIC018291 AS2_scf7180000696055 CDS join(5297373..5297652,5297711..5303712)	hypothetical protein		hypothetical protein	3	0.000477555
620	ASIC018336	6669	KFB50259	ASIC018336 AS2_scf7180000696055 CDS join(5607121..5607276,5607682..5607868,5608580..5609316,5609914..5611510,5611589..5612346,5612439..5613290,5613438..5613514,5614336..5614420,5615015..5615337,5615422..5615851,5615942..5617381,5617446..5617472)	hypothetical protein		hypothetical protein	1	0.000149948
621	ASIC018391	1827	KFB49737	ASIC018391 AS2_scf7180000696055 CDS 1006932..1008758	hypothetical protein		hypothetical protein	1	0.000547345
622	ASIC018441	1713	KFB50413	ASIC018441 AS2_scf7180000696056 CDS complement(join(1300435..1301660,1301727..1301956,1302016..1302215,1302290..1302346))	AGAP005754-PA-like protein		with AGAP ID	1	0.000583771
623	ASIC018450	1407	KFB50422	ASIC018450 AS2_scf7180000696056 CDS complement(join(1401171..1402170,1402240..1402567,1402848..1402926))	AGAP005759-PA-like protein		uncharacterized protein	1	0.000710732
624	ASIC018453	855	KFB50424	ASIC018453 AS2_scf7180000696056 CDS join(1424064..1424279,1424366..1425004)	hypothetical protein		hypothetical protein	1	0.00116959
625	ASIC018472	1575	KFB50442	ASIC018472 AS2_scf7180000696056 CDS complement(join(1584423..1584559,1584637..1585858,1585924..1586139))	iduronate 2-sulfatase precursor		AC2_annotated	1	0.000634921
626	ASIC018487	270	KFB50455	ASIC018487 AS2_scf7180000696056 CDS 1642169..1642438	uridylate kinase		AC2_annotated	1	0.0037037
627	ASIC018515	3342	KFB50480	ASIC018515 AS2_scf7180000696056 CDS join(1886279..1886298,1886377..1889698)	AGAP007060-PA-like protein		uncharacterized protein	1	0.000299222
628	ASIC018516	3120	KFB50481	ASIC018516 AS2_scf7180000696056 CDS join(1891603..1891622,1891709..1892839,1892938..1894867,1894920..1894958)	AGAP007060-PA-like protein		uncharacterized protein	1	0.000320513
629	ASIC018579	4482	KFB50313	ASIC018579 AS2_scf7180000696056 CDS complement(join(310758..315220,315346..315364))	hypothetical protein		hypothetical protein	1	0.000223115
630	ASIC018605	360	KFB50335	ASIC018605 AS2_scf7180000696056 CDS complement(550466..550825)	OnnI		AC2_annotated	1	0.00277778
631	ASIC018625	1446	KFB50354	ASIC018625 AS2_scf7180000696056 CDS 758528..759973	AGAP009184-PA-like protein		Immunity	1	0.000691563
632	ASIC018627	1470	KFB50355	ASIC018627 AS2_scf7180000696056 CDS 763990..765459	fibrinogen and fibronectin		Immunity	1	0.000680272
633	ASIC018648	6819	KFB50296	ASIC018648 AS2_scf7180000696056 CDS complement(join(136186..137108,137186..137477,138482..139197,139456..139808,140019..140212,140942..141181,141266..141973,142050..142367,143681..143858,143945..144464,144519..146501,146558..146749,146950..147151))	AGAP004866-PA-like protein		uncharacterized protein	1	0.000146649
634	ASIC018656	1218	KFB50382	ASIC018656 AS2_scf7180000696056 CDS 1049398..1050615	AGAP005306-PA-like protein		with AGAP ID	1	0.000821018
635	ASIC018679	3099	KFB50646	ASIC018679 AS2_scf7180000696057 CDS join(1019866..1020448,1020564..1020788,1021095..1021580,1021663..1021803,1021873..1021960,1022016..1022579,1022662..1022825,1022901..1023062,1023280..1023424,1034791..1034905,1050893..1051318)	AGAP007137-PA-like protein		uncharacterized protein	1	0.000322685
636	ASIC018693	1932	KFB50547	ASIC018693 AS2_scf7180000696057 CDS complement(join(113780..115622,115688..115776))	AGAP006661-PA-like protein		with AGAP ID	1	0.000517598
637	ASIC018704	3105	KFB50548	ASIC018704 AS2_scf7180000696057 CDS join(116319..116381,116520..116988,117057..117601,117676..118178,118250..119066,119152..119199,119271..119873,119957..120013)	hypothetical protein		hypothetical protein	2	0.000644122
638	ASIC018752	1944	KFB50711	ASIC018752 AS2_scf7180000696057 CDS complement(join(1957558..1957927,1957992..1958315,1959636..1959802,1998084..1998320,1998420..1999265))	AGAP006266-PA-like protein		with AGAP ID	2	0.00102881
639	ASIC018770	525	KFB50536	ASIC018770 AS2_scf7180000696057 CDS complement(37494..38018)	hypothetical protein		hypothetical protein	1	0.00190476
640	ASIC018775	270	KFB50730	ASIC018775 AS2_scf7180000696057 CDS 2139604..2139873	hypothetical protein		hypothetical protein	1	0.0037037
641	ASIC018781	168	KFB50736	ASIC018781 AS2_scf7180000696057 CDS 2212165..2212332	hypothetical protein		hypothetical protein	1	0.00595238
642	ASIC018855	1170	KFB50803	ASIC018855 AS2_scf7180000696057 CDS join(2804844..2804988,2807120..2807278,2807368..2807455,2807537..2808017,2808081..2808264,2808364..2808476)	AGAP006913-PA-like protein		uncharacterized protein	1	0.000854701
643	ASIC018856	1158	KFB50804	ASIC018856 AS2_scf7180000696057 CDS complement(2827419..2828576)	hypothetical protein		hypothetical protein	1	0.000863558
644	ASIC018866	312	KFB50813	ASIC018866 AS2_scf7180000696057 CDS complement(join(2908873..2908923,2908989..2909249))	AGAP006905-PA-like protein		uncharacterized protein	1	0.00320513
645	ASIC018872	498	KFB50818	ASIC018872 AS2_scf7180000696057 CDS complement(join(2957011..2957121,2957563..2957757,2959145..2959336))	hypothetical protein		hypothetical protein	2	0.00401606
646	ASIC018906	1626	KFB50589	ASIC018906 AS2_scf7180000696057 CDS complement(join(402916..403116,403184..403438,403520..403864,403927..404318,404387..404537,404751..404888,404952..405095))	AGAP006227-PA-like protein		Detoxification	1	0.000615006
647	ASIC018916	1581	KFB50598	ASIC018916 AS2_scf7180000696057 CDS complement(join(432104..433239,433314..433499,433573..433660,433725..433895))	AGAP007029-PA-like protein		with AGAP ID	1	0.000632511
648	ASIC018921	3885	KFB50602	ASIC018921 AS2_scf7180000696057 CDS join(463586..463625,463730..463902,463974..464853,464922..465172,465417..467886,467957..468027)	AGAP005638-PA-like protein		Detoxification	1	0.0002574
649	ASIC018927	1986	KFB50607	ASIC018927 AS2_scf7180000696057 CDS join(528417..528876,528937..530462)	AGAP005643-PA-like protein		with AGAP ID	1	0.000503525
650	ASIC018941	2742	KFB50618	ASIC018941 AS2_scf7180000696057 CDS complement(join(612406..612492,612565..614954,615029..615188,615259..615363))	AGAP007126-PA-like protein		with AGAP ID	1	0.000364697
651	ASIC018980	1935	KFB50939	ASIC018980 AS2_scf7180000696058 CDS complement(join(963976..964634,964732..965600,966025..966285,967379..967481,967959..968001))	AGAP006185-PA-like protein		uncharacterized protein	3	0.00155039
652	ASIC018987	4482	KFB50947	ASIC018987 AS2_scf7180000696058 CDS complement(join(1019385..1019740,1019824..1019926,1020131..1020207,1021841..1022171,1022239..1022511,1022579..1022837,1023807..1024010,1024092..1024253,1025275..1025442,1025662..1025811,1025869..1026302,1027097..1027251,1027330..1027976,1029166..1029289,1046402..1047406,1048376..1048409))	AGAP006188-PA-like protein		uncharacterized protein	1	0.000223115
653	ASIC019023	222	KFB50979	ASIC019023 AS2_scf7180000696058 CDS complement(1324651..1324872)	hypothetical protein		hypothetical protein	1	0.0045045
654	ASIC019034	531	KFB50989	ASIC019034 AS2_scf7180000696058 CDS join(1360264..1360365,1360425..1360538,1360602..1360916)	AGAP006075-PA-like protein	OBP49	odorant protein	1	0.00188324
655	ASIC019040	5703	KFB50995	ASIC019040 AS2_scf7180000696058 CDS complement(join(1367060..1367459,1367763..1367875,1367961..1368111,1369716..1370050,1373428..1373593,1377240..1377471,1377540..1377673,1377742..1377943,1378007..1379290,1379958..1380739,1380817..1381432,1382425..1382540,1382624..1382679,1382720..1383381,1384850..1385161,1385331..1385472))	AGAP006083-PB-like protein		with AGAP ID	1	0.000175346
656	ASIC019103	1260	KFB51050	ASIC019103 AS2_scf7180000696058 CDS 1910772..1912031	AGAP007469-PA-like protein		uncharacterized protein	1	0.000793651
657	ASIC019113	738	KFB51059	ASIC019113 AS2_scf7180000696058 CDS join(1945026..1945116,1945237..1945812,1946040..1946110)	hypothetical protein		hypothetical protein	1	0.00135501
658	ASIC019142	2346	KFB51086	ASIC019142 AS2_scf7180000696058 CDS join(2133043..2133280,2133369..2133602,2133687..2133840,2133949..2134079,2134194..2135466,2135536..2135675,2135758..2135933)	AGAP006730-PA-like protein		uncharacterized protein	1	0.000426257
659	ASIC019145	1257	KFB51088	ASIC019145 AS2_scf7180000696058 CDS complement(join(2141533..2141833,2141902..2142311,2142353..2142845,2142912..2142964))	AGAP006728-PA-like protein	COEAE7G	Detoxification	1	0.000795545
660	ASIC019151	1821	KFB51094	ASIC019151 AS2_scf7180000696058 CDS join(2152682..2152783,2152849..2154149,2154215..2154632)	AGAP006724-PA-like protein	COEAE3G	Detoxification	1	0.000549149
661	ASIC019154	498	KFB51097	ASIC019154 AS2_scf7180000696058 CDS complement(2169718..2170215)	phospholipase D		AC2_annotated	1	0.00200803
662	ASIC019169	1215	KFB51110	ASIC019169 AS2_scf7180000696058 CDS complement(join(2293680..2293799,2293881..2293973,2294037..2294102,2294164..2295099))	AGAP006713-PB-like protein	Gr28	with AGAP ID	1	0.000823045
663	ASIC019174	1740	KFB51115	ASIC019174 AS2_scf7180000696058 CDS join(2309051..2309110,2309326..2309371,2310834..2311075,2311154..2311249,2315727..2315913,2316004..2316087,2317594..2317727,2317931..2318067,2318145..2318378,2318458..2318620,2318692..2318860,2318922..2319109)	AGAP006705-PA-like protein		uncharacterized protein	1	0.000574713
664	ASIC019233	4869	KFB50887	ASIC019233 AS2_scf7180000696058 CDS join(516988..517234,517335..517516,517588..519331,520446..521058,521131..521857,522941..523108,523203..523361,524074..524176,524233..524499,524571..525229)	AGAP005035-PA-like protein		with AGAP ID	1	0.000205381
665	ASIC019236	8607	KFB50890	ASIC019236 AS2_scf7180000696058 CDS join(533401..536648,536801..537675,538356..541221,541297..541462,542370..543039,543075..543340,543416..543931)	AGAP005033-PA-like protein		with AGAP ID	1	0.000116185
666	ASIC019244	465	KFB50897	ASIC019244 AS2_scf7180000696058 CDS join(556628..556642,556717..557166)	AGAP007151-PA-like protein		uncharacterized protein	1	0.00215054
667	ASIC019343	660	KFB51292	ASIC019343 AS2_scf7180000696059 CDS complement(join(1544230..1544811,1545289..1545366))	hypothetical protein		hypothetical protein	1	0.00151515
668	ASIC019353	1725	KFB51301	ASIC019353 AS2_scf7180000696059 CDS complement(1600771..1602495)	AGAP012121-PA-like protein		with AGAP ID	3	0.00173913
669	ASIC019368	3825	KFB51315	ASIC019368 AS2_scf7180000696059 CDS join(1761493..1761772,1762180..1765035,1766882..1767397,1767734..1767906)	hypothetical protein		hypothetical protein	1	0.000261438
670	ASIC019374	6498	KFB51320	ASIC019374 AS2_scf7180000696059 CDS join(1785573..1785645,1785713..1786617,1787050..1789412,1789620..1789838,1791453..1792234,1792283..1792518,1792615..1792810,1792859..1794150,1794224..1794391,1794820..1795083)	tuberous sclerosis complex 2 (TSC2)		AC2_annotated	1	0.000153894
671	ASIC019383	1659	KFB51153	ASIC019383 AS2_scf7180000696059 CDS join(171535..171866,171944..172215,172284..173338)	AGAP010623-PA-like protein		with AGAP ID	1	0.000602773
672	ASIC019427	258	KFB51168	ASIC019427 AS2_scf7180000696059 CDS join(318753..318877,318923..319055)	ferredoxin		AC2_annotated	1	0.00387597
673	ASIC019432	1473	KFB51137	ASIC019432 AS2_scf7180000696059 CDS complement(join(33207..34240,34300..34464,34534..34807))	hypothetical protein		hypothetical protein	1	0.000678887
674	ASIC019460	1671	KFB51197	ASIC019460 AS2_scf7180000696059 CDS complement(join(552316..552667,552726..552967,553045..553563,553897..554184,554261..554530))	AGAP011079-PA-like protein		uncharacterized protein	1	0.000598444
675	ASIC019487	4128	KFB51142	ASIC019487 AS2_scf7180000696059 CDS complement(join(53618..55050,55077..56663,56733..56880,57325..57915,58918..58956,59622..59951))	hypothetical protein		hypothetical protein	1	0.000242248
676	ASIC019517	2307	KFB51464	ASIC019517 AS2_scf7180000696060 CDS join(1615863..1616021,1620412..1621912,1621946..1622592)	hypothetical protein		hypothetical protein	1	0.000433463
677	ASIC019518	921	KFB51465	ASIC019518 AS2_scf7180000696060 CDS join(1623997..1624201,1624259..1624400,1624462..1624656,1624746..1625124)	AGAP006533-PA-like protein		with AGAP ID	1	0.00108578
678	ASIC019576	1131	KFB51369	ASIC019576 AS2_scf7180000696060 CDS join(228482..228688,229023..229946)	hypothetical protein		hypothetical protein	1	0.000884173
679	ASIC019657	1764	KFB51586	ASIC019657 AS2_scf7180000696060 CDS complement(join(2738340..2739503,2739775..2740075,2740413..2740711))	AGAP006786-PA-like protein		with AGAP ID	1	0.000566893
680	ASIC019673	1311	KFB51601	ASIC019673 AS2_scf7180000696060 CDS join(2854249..2854362,2854433..2855385,2855457..2855700)	hypothetical protein		hypothetical protein	1	0.000762777
681	ASIC019697	17736	KFB51623	ASIC019697 AS2_scf7180000696060 CDS complement(join(3020345..3020527,3020593..3021388,3021461..3031001,3031066..3035497,3035573..3038006,3038069..3038325,3038424..3038516))	hypothetical protein		hypothetical protein	1	5.63825e-05
682	ASIC019728	324	KFB51649	ASIC019728 AS2_scf7180000696060 CDS complement(join(3193096..3193380,3193529..3193567))	hypothetical protein		hypothetical protein	1	0.00308642
683	ASIC019736	3936	KFB51654	ASIC019736 AS2_scf7180000696060 CDS join(3261004..3263830,3263922..3264459,3264531..3265101)	AGAP007417-PA-like protein		with AGAP ID	1	0.000254065
684	ASIC019742	2769	KFB51660	ASIC019742 AS2_scf7180000696060 CDS complement(join(3286163..3286913,3287008..3288475,3288545..3288885,3288964..3289172))	AGAP007422-PA-like protein		uncharacterized protein	1	0.000361141
685	ASIC019750	1440	KFB51667	ASIC019750 AS2_scf7180000696060 CDS 3330967..3332406	AGAP007442-PA-like protein		uncharacterized protein	3	0.00208333
686	ASIC019762	6528	KFB51678	ASIC019762 AS2_scf7180000696060 CDS complement(join(3370878..3370915,3371048..3371252,3371331..3371493,3371571..3371720,3372089..3373886,3395383..3395462,3395559..3399652))	AGAP007452-PA-like protein		with AGAP ID	1	0.000153186
687	ASIC019793	186	KFB51706	ASIC019793 AS2_scf7180000696060 CDS complement(3563657..3563842)	response regulator		AC2_annotated	1	0.00537634
688	ASIC019796	4869	KFB51708	ASIC019796 AS2_scf7180000696060 CDS complement(join(3569895..3570147,3570219..3570353,3570439..3570710,3570771..3570825,3571624..3572092,3572817..3573017,3573101..3573361,3573426..3573582,3575307..3575420,3575491..3575968,3576101..3577292,3577363..3577686,3577752..3577945,3578023..3578201,3578268..3578591,3578668..3578928))	hypothetical protein		hypothetical protein	1	0.000205381
689	ASIC019848	6021	KFB51754	ASIC019848 AS2_scf7180000696060 CDS join(3926904..3928241,3928313..3929566,3929634..3931714,3933102..3934449)	AGAP007533-PA-like protein		with AGAP ID	1	0.000166085
690	ASIC019856	6591	KFB51761	ASIC019856 AS2_scf7180000696060 CDS join(3991900..3993103,3993133..3997496,3997608..3998556,3998582..3998655)	hypothetical protein		hypothetical protein	1	0.000151722
691	ASIC019857	5688	KFB51762	ASIC019857 AS2_scf7180000696060 CDS join(3998787..4000973,4001055..4003289,4003354..4003741,4003821..4004494,4004562..4004765)	hypothetical protein		hypothetical protein	1	0.000175809
692	ASIC019888	3942	KFB51359	ASIC019888 AS2_scf7180000696060 CDS join(76484..76499,76843..77159,87476..87796,93282..93382,93476..93685,93766..94212,94290..94892,95006..95191,95450..96216,96379..97352)	homeodomain interacting protein kinase, isoform A		AC2_annotated	1	0.000253678
693	ASIC019900	330	KFB51421	ASIC019900 AS2_scf7180000696060 CDS join(1082094..1082106,1082473..1082789)	plastocyanin		AC2_annotated	2	0.00606061
694	ASIC019963	7122	KFB51776	ASIC019963 AS2_scf7180000696062 CDS complement(join(33207..33386,33455..33583,33659..33726,35133..41877))	AGAP010697-PA-like protein		uncharacterized protein	1	0.00014041
695	ASIC019978	3372	KFB51823	ASIC019978 AS2_scf7180000696063 CDS complement(join(125338..125610,126158..128850,130222..130526,130804..130904))	AGAP013193-PA-like protein		uncharacterized protein	1	0.00029656
696	ASIC019990	1218	KFB51834	ASIC019990 AS2_scf7180000696063 CDS join(198767..198961,199031..200053)	AGAP000507-PA-like protein		uncharacterized protein	1	0.000821018
697	ASIC019995	3654	KFB51838	ASIC019995 AS2_scf7180000696063 CDS complement(join(208209..211794,211863..211930))	AGAP004088-PA-like protein		uncharacterized protein	1	0.000273673
698	ASIC019996	2181	KFB51839	ASIC019996 AS2_scf7180000696063 CDS complement(212606..214786)	AGAP001653-PA-like protein		with AGAP ID	1	0.000458505
699	ASIC020012	342	KFB51856	ASIC020012 AS2_scf7180000696065 CDS complement(43247..43588)	hypothetical protein		hypothetical protein	1	0.00292398
700	ASIC020103	5559	KFB51917	ASIC020103 AS2_scf7180000696069 CDS join(34196..34337,34420..34604,34680..34876,34941..37135,37632..40471)	AGAP001386-PA-like protein		with AGAP ID	2	0.000359777
701	ASIC020114	3366	KFB51947	ASIC020114 AS2_scf7180000696070 CDS join(145810..145848,145924..147106,147284..148472,148572..148984,149088..149381,150091..150338)	AGAP004265-PA-like protein		uncharacterized protein	1	0.000297089
702	ASIC020153	264	KFB51972	ASIC020153 AS2_scf7180000696071 CDS join(15299..15354,15699..15906)	MazG family protein		AC2_annotated	1	0.00378788
703	ASIC020161	1677	KFB51981	ASIC020161 AS2_scf7180000696072 CDS join(8877..9024,9106..9200,9281..9435,9511..10063,10122..10847)	AGAP004456-PA-like protein	GNBPB5	Immunity	1	0.000596303
704	ASIC020222	336	KFB52021	ASIC020222 AS2_scf7180000696076 CDS complement(join(28012..28312,28474..28508))	riboflavin synthase, alpha subunit		AC2_annotated	1	0.00297619
705	ASIC020227	1917	KFB52043	ASIC020227 AS2_scf7180000696077 CDS complement(join(52645..53154,53217..53845,53899..54037,54099..54340,54420..54816))	AGAP012969-PA-like protein	IR41t.2	with AGAP ID	1	0.000521648
706	ASIC020232	1173	KFB52048	ASIC020232 AS2_scf7180000696077 CDS complement(join(69148..69521,69545..69644,69710..69835,69900..70472))	AGAP004428-PA-like protein		with AGAP ID	1	0.000852515
707	ASIC020276	1185	KFB52081	ASIC020276 AS2_scf7180000696079 CDS join(22..826,869..1248)	hypothetical protein		hypothetical protein	1	0.000843882
708	ASIC020379	1614	KFB52263	ASIC020379 AS2_scf7180000696079 CDS complement(join(1866024..1866921,1866979..1867048,1867115..1867394,1868028..1868143,1868220..1868469))	AGAP000193-PA-like protein	CYP4C37	Detoxification	1	0.000619579
709	ASIC020407	3132	KFB52288	ASIC020407 AS2_scf7180000696079 CDS join(2089041..2089088,2090514..2091816,2092904..2094435,2094500..2094657,2094724..2094814)	AGAP001021-PA-like protein		with AGAP ID	1	0.000319285
710	ASIC020538	1158	KFB52332	ASIC020538 AS2_scf7180000696081 CDS complement(join(564..1486,1558..1792))	hypothetical protein		hypothetical protein	1	0.000863558
711	ASIC020562	1236	KFB52347	ASIC020562 AS2_scf7180000696088 CDS complement(join(455..647,8142..8366,9100..9321,11268..11801,11964..12025))	hypothetical protein		hypothetical protein	1	0.000809061
712	ASIC020573	1125	KFB52363	ASIC020573 AS2_scf7180000696089 CDS join(89402..89999,90038..90564)	AGAP004359-PA-like protein		with AGAP ID	2	0.00177778
713	ASIC020592	4413	KFB52380	ASIC020592 AS2_scf7180000696089 CDS join(178890..181474,182104..182428,182455..183502,183571..184025)	AGAP004345-PA-like protein		uncharacterized protein	1	0.000226603
714	ASIC020600	1584	KFB52384	ASIC020600 AS2_scf7180000696089 CDS complement(join(284903..285985,286892..287392))	AGAP013122-PA-like protein		with AGAP ID	1	0.000631313
715	ASIC020602	1959	KFB52360	ASIC020602 AS2_scf7180000696089 CDS complement(join(55406..55494,55572..55863,55942..57098,57399..57569,58148..58325,59126..59197))	AGAP004363-PA-like protein		with AGAP ID	2	0.00102093
716	ASIC020660	849	KFB52421	ASIC020660 AS2_scf7180000696101 CDS join(47650..48397,48450..48550)	hypothetical protein		hypothetical protein	1	0.00117786
717	ASIC020730	2424	KFB52487	ASIC020730 AS2_scf7180000696106 CDS complement(join(622710..624008,624075..624617,625413..625994))	hypothetical protein		hypothetical protein	1	0.000412541
718	ASIC020732	1116	KFB52488	ASIC020732 AS2_scf7180000696106 CDS complement(join(626185..626449,626487..626794,626876..627418))	AGAP008964-PA-like protein		with AGAP ID	1	0.000896057
719	ASIC020774	4410	KFB52526	ASIC020774 AS2_scf7180000696106 CDS join(889627..889701,890522..890632,892032..892149,892221..896079,896152..896351,897295..897341)	hypothetical protein		hypothetical protein	1	0.000226757
720	ASIC020807	318	KFB52549	ASIC020807 AS2_scf7180000696107 CDS complement(27245..27562)	hypothetical protein		hypothetical protein	1	0.00314465
721	ASIC020843	2643	KFB52588	ASIC020843 AS2_scf7180000696109 CDS complement(join(13229..13639,13712..13976,14052..15515,15580..16045,16115..16151))	AGAP010071-PA-like protein		with AGAP ID	4	0.00151343
722	ASIC020867	2106	KFB52617	ASIC020867 AS2_scf7180000696110 CDS complement(join(158168..158839,158934..159095,159338..160609))	AGAP003885-PA-like protein		with AGAP ID	1	0.000474834
723	ASIC020902	1491	KFB52628	ASIC020902 AS2_scf7180000696112 CDS join(60646..60767,60838..61095,61308..61599,61681..62228,62308..62578)	AGAP010967-PA-like protein		with AGAP ID	1	0.000670691
724	ASIC020946	2658	KFB52689	ASIC020946 AS2_scf7180000696113 CDS join(355020..355501,355569..355715,355797..355929,355997..356350,356413..357954)	AGAP003695-PA-like protein		with AGAP ID	1	0.000376223
725	ASIC020957	5262	KFB52698	ASIC020957 AS2_scf7180000696113 CDS join(399077..399119,400168..400917,400987..401161,402104..403182,403264..404284,404399..404526,404597..405702,405805..406764)	AGAP002949-PA-like protein		uncharacterized protein	1	0.000190042
726	ASIC020975	513	KFB52717	ASIC020975 AS2_scf7180000696114 CDS 80080..80592	uncharacterized protein LOC101332410		uncharacterized protein	1	0.00194932
727	ASIC020978	2739	KFB52720	ASIC020978 AS2_scf7180000696114 CDS complement(join(123148..125213,125288..125960))	AGAP002231-PA-like protein		uncharacterized protein	1	0.000365097
728	ASIC021023	2328	KFB52753	ASIC021023 AS2_scf7180000696116 CDS complement(join(2665..3859,4772..4979,5154..5387,5565..6255))	hypothetical protein		hypothetical protein	1	0.000429553
729	ASIC021070	432	KFB52802	ASIC021070 AS2_scf7180000696116 CDS complement(307424..307855)	hypothetical protein		hypothetical protein	1	0.00231481
730	ASIC021092	1470	KFB52820	ASIC021092 AS2_scf7180000696116 CDS join(448469..448590,451992..452388,452458..452754,452821..453024,453116..453294,453364..453634)	AGAP002451-PA-like protein	SCRB1	Immunity	1	0.000680272
731	ASIC021128	273	KFB52823	ASIC021128 AS2_scf7180000696117 CDS 94709..94981	hypothetical protein		hypothetical protein	1	0.003663
732	ASIC021136	1902	KFB52863	ASIC021136 AS2_scf7180000696118 CDS join(242448..243186,244308..244583,244666..244838,246542..246918,247004..247340)	AGAP006111-PA-like protein		uncharacterized protein	1	0.000525762
733	ASIC021199	474	KFB52917	ASIC021199 AS2_scf7180000696118 CDS 677686..678159	uncharacterized protein LOC101210263		uncharacterized protein	1	0.0021097
734	ASIC021208	4215	KFB52925	ASIC021208 AS2_scf7180000696118 CDS join(795905..798582,798651..798692,798764..799763,799824..799975,800047..800217,800288..800459)	AGAP005789-PA-like protein		uncharacterized protein	1	0.000237248
735	ASIC021221	1032	KFB52935	ASIC021221 AS2_scf7180000696119 CDS complement(8817..9848)	AGAP013240-PA-like protein		uncharacterized protein	1	0.000968992
736	ASIC021253	306	KFB53057	ASIC021253 AS2_scf7180000696120 CDS 1148582..1148887	sulfatase		AC2_annotated	2	0.00653595
737	ASIC021288	519	KFB52995	ASIC021288 AS2_scf7180000696120 CDS complement(364234..364752)	dipeptidyl peptidase 9 isoform X4		AC2_annotated	1	0.00192678
738	ASIC021290	444	KFB52997	ASIC021290 AS2_scf7180000696120 CDS join(408376..408646,409404..409576)	anti-RNA polymerase sigma 70 factor		AC2_annotated	3	0.00675676
739	ASIC021313	459	KFB53018	ASIC021313 AS2_scf7180000696120 CDS join(674660..674766,675377..675728)	hypothetical protein		hypothetical protein	1	0.00217865
740	ASIC021321	339	KFB53024	ASIC021321 AS2_scf7180000696120 CDS complement(join(847178..847498,847718..847735))	Protein toll		AC2_annotated	1	0.00294985
741	ASIC021325	1707	KFB53026	ASIC021325 AS2_scf7180000696120 CDS complement(join(882984..883190,883254..883321,883388..883741,883814..884194,884261..884664,884737..884957,885022..885093))	AGAP007338-PA-like protein		with AGAP ID	1	0.000585823
742	ASIC021357	5181	KFB53061	ASIC021357 AS2_scf7180000696121 CDS join(6250..6504,7475..8404,8511..10581,10634..12558)	AGAP010934-PA-like protein		uncharacterized protein	1	0.000193013
743	ASIC021394	288	KFB53101	ASIC021394 AS2_scf7180000696124 CDS 188868..189155	hypothetical protein		hypothetical protein	1	0.00347222
744	ASIC021425	1344	KFB53131	ASIC021425 AS2_scf7180000696125 CDS complement(138650..139993)	AGAP003876-PA-like protein		with AGAP ID	1	0.000744048
745	ASIC021457	6837	KFB53158	ASIC021457 AS2_scf7180000696126 CDS join(191232..191318,191403..191516,191603..191722,191792..191981,192784..193005,193077..193254,193318..193495,193580..193836,193914..194082,194160..194468,194545..194707,194779..195073,195154..195432,195504..195845,195927..196100,196178..197234,197406..197660,197798..197961,198036..198495,198563..198607,198704..199106,200098..200346,201498..201693,201756..20251…	AGAP003616-PA-like protein		uncharacterized protein	1	0.000146263
746	ASIC021459	5493	KFB53160	ASIC021459 AS2_scf7180000696126 CDS join(219382..219420,219680..219761,220892..221097,221190..221309,221386..221558,221644..222488,222588..225806,225883..226013,228034..228470,228548..228788)	AGAP003619-PA-like protein		with AGAP ID	1	0.00018205
747	ASIC021476	2223	KFB53174	ASIC021476 AS2_scf7180000696126 CDS join(364254..365741,365801..366082,366149..366423,366481..366658)	AGAP002089-PA-like protein		uncharacterized protein	2	0.000899685
748	ASIC021528	3015	KFB53220	ASIC021528 AS2_scf7180000696126 CDS complement(join(644157..645462,645563..646660,646731..647082,647159..647417))	AGAP003230-PA-like protein		with AGAP ID	1	0.000331675
749	ASIC021533	648	KFB53225	ASIC021533 AS2_scf7180000696126 CDS complement(join(667122..667233,667294..667636,667709..667901))	AGAP003225-PA-like protein		uncharacterized protein	1	0.00154321
750	ASIC021554	645	KFB53234	ASIC021554 AS2_scf7180000696127 CDS complement(join(24943..25430,25487..25643))	serine/threonine protein kinase		AC2_annotated	1	0.00155039
751	ASIC021601	558	KFB53296	ASIC021601 AS2_scf7180000696129 CDS join(118010..118125,119099..119540)	elongation factor P		AC2_annotated	1	0.00179211
752	ASIC021603	564	KFB53298	ASIC021603 AS2_scf7180000696129 CDS complement(join(140615..141048,141983..142112))	Dvir\GJ17601-PA-like protein		AC2_annotated	1	0.00177305
753	ASIC021627	234	KFB53287	ASIC021627 AS2_scf7180000696129 CDS join(30041..30084,30150..30339)	hypothetical protein		hypothetical protein	2	0.00854701
754	ASIC021628	771	KFB53288	ASIC021628 AS2_scf7180000696129 CDS complement(join(32657..32996,33081..33511))	uncharacterized protein LOC101450533		uncharacterized protein	1	0.00129702
755	ASIC021631	261	KFB53291	ASIC021631 AS2_scf7180000696129 CDS complement(55384..55644)	Methionine--tRNA ligase		AC2_annotated	2	0.00766284
756	ASIC021666	12315	KFB53322	ASIC021666 AS2_scf7180000696130 CDS join(14994..15132,15211..17947,30724..34465,34522..40218)	AGAP003967-PA-like protein		with AGAP ID	1	8.12018e-05
757	ASIC021690	2859	KFB53377	ASIC021690 AS2_scf7180000696130 CDS complement(join(560187..560754,560873..561441,561549..562216,562292..562432,564144..564287,565544..565797,568005..568519))	AGAP012963-PA-like protein		uncharacterized protein	1	0.000349773
758	ASIC021712	1479	KFB53395	ASIC021712 AS2_scf7180000696130 CDS complement(join(756884..757080,758031..758225,758418..758590,758654..759567))	AGAP003356-PA-like protein		with AGAP ID	1	0.000676133
759	ASIC021714	297	KFB53397	ASIC021714 AS2_scf7180000696130 CDS complement(782197..782493)	dentin sialophosphoprotein-like protein		AC2_annotated	1	0.003367
760	ASIC021792	234	KFB53559	ASIC021792 AS2_scf7180000696131 CDS complement(join(1472851..1473017,1473238..1473304))	hypothetical protein		hypothetical protein	1	0.0042735
761	ASIC021800	1749	KFB53566	ASIC021800 AS2_scf7180000696131 CDS 1571754..1573502	hypothetical protein		hypothetical protein	1	0.000571755
762	ASIC021809	11115	KFB53574	ASIC021809 AS2_scf7180000696131 CDS join(1607185..1607304,1607380..1607459,1607700..1607910,1608454..1608570,1608645..1611414,1612794..1616920,1616998..1617157,1619245..1622647,1622973..1623099)	AGAP004144-PA-like protein		uncharacterized protein	1	8.99685e-05
763	ASIC021866	2109	KFB53625	ASIC021866 AS2_scf7180000696131 CDS complement(join(2057590..2058221,2058298..2058703,2058777..2059363,2061257..2061488,2061561..2061772,2061840..2061879))	AGAP002603-PA-like protein		with AGAP ID	1	0.000474158
764	ASIC021964	345	KFB53458	ASIC021964 AS2_scf7180000696131 CDS complement(join(545175..545264,546055..546309))	hypothetical protein		hypothetical protein	3	0.00869565
765	ASIC021965	519	KFB53459	ASIC021965 AS2_scf7180000696131 CDS complement(549710..550228)	glutamate synthase (ferredoxin)		AC2_annotated	1	0.00192678
766	ASIC021977	366	KFB53470	ASIC021977 AS2_scf7180000696131 CDS complement(join(622790..622932,622983..623205))	Sarcosine oxidase gamma subunit		AC2_annotated	1	0.00273224
767	ASIC021983	381	KFB53475	ASIC021983 AS2_scf7180000696131 CDS complement(716985..717365)	hypothetical protein		hypothetical protein	1	0.00262467
768	ASIC022003	369	KFB53675	ASIC022003 AS2_scf7180000696133 CDS 25176..25544	hypothetical protein		hypothetical protein	1	0.00271003
769	ASIC022011	282	KFB53777	ASIC022011 AS2_scf7180000696133 CDS 1407145..1407426	hypothetical protein		hypothetical protein	1	0.0035461
770	ASIC022024	1065	KFB53789	ASIC022024 AS2_scf7180000696133 CDS join(1782482..1782529,1782599..1783615)	AGAP009702-PA-like protein		with AGAP ID	1	0.000938967
771	ASIC022077	303	KFB53677	ASIC022077 AS2_scf7180000696133 CDS complement(43975..44277)	hypothetical protein		hypothetical protein	1	0.00330033
772	ASIC022078	3615	KFB53702	ASIC022078 AS2_scf7180000696133 CDS join(334676..334812,334886..335006,335086..335246,335316..335593,335682..336305,336388..336513,336589..338756)	hypothetical protein		hypothetical protein	1	0.000276625
773	ASIC022083	7515	KFB53707	ASIC022083 AS2_scf7180000696133 CDS complement(join(366154..366475,368526..368666,388375..388470,420967..421210,421288..421875,421935..422067,422146..422253,422332..422490,423208..423870,423952..424306,427558..428244,496182..496382,496444..496586,496658..496878,496950..497292,498998..499206,500919..501061,501135..501718,501789..502272,502343..502723,502790..503438,503507..503959,504617..504784,50…	hypothetical protein	ANCE7	hypothetical protein	1	0.000133067
774	ASIC022116	672	KFB53737	ASIC022116 AS2_scf7180000696133 CDS complement(join(827144..827335,827458..827799,827952..828089))	hypothetical protein		hypothetical protein	2	0.00297619
775	ASIC022143	2019	KFB53682	ASIC022143 AS2_scf7180000696133 CDS complement(103167..105185)	AGAP009772-PA-like protein		with AGAP ID	1	0.000495295
776	ASIC022145	726	KFB53763	ASIC022145 AS2_scf7180000696133 CDS complement(join(1154021..1154046,1154215..1154404,1156909..1157091,1168676..1168989,1169088..1169100))	Dgri\GH25257-PA-like protein		AC2_annotated	1	0.00137741
777	ASIC022161	657	KFB53919	ASIC022161 AS2_scf7180000696135 CDS join(1079517..1080161,1080256..1080267)	hypothetical protein		hypothetical protein	1	0.00152207
778	ASIC022184	1932	KFB53938	ASIC022184 AS2_scf7180000696135 CDS join(1226981..1227288,1227365..1227627,1228324..1228581,1228648..1229534,1229600..1229815)	hypothetical protein		hypothetical protein	1	0.000517598
779	ASIC022191	1839	KFB53945	ASIC022191 AS2_scf7180000696135 CDS join(1269008..1269094,1269823..1270575,1270647..1270750,1270838..1271213,1271288..1271549,1271620..1271876)	sodium-dependent nutrient amino acid transporter 3		AC2_annotated	1	0.000543774
780	ASIC022192	222	KFB53834	ASIC022192 AS2_scf7180000696135 CDS 158644..158865	butyrophilin-like protein 1-like protein		AC2_annotated	1	0.0045045
781	ASIC022236	1215	KFB53838	ASIC022236 AS2_scf7180000696135 CDS complement(215297..216511)	AGAP005667-PA-like protein		uncharacterized protein	1	0.000823045
782	ASIC022259	417	KFB54005	ASIC022259 AS2_scf7180000696135 CDS 1838895..1839311	hypothetical protein		hypothetical protein	1	0.00239808
783	ASIC022273	1338	KFB54016	ASIC022273 AS2_scf7180000696135 CDS complement(join(2061266..2061389,2061521..2062734))	hypothetical protein		hypothetical protein	1	0.000747384
784	ASIC022287	3774	KFB53848	ASIC022287 AS2_scf7180000696135 CDS complement(join(305817..306257,306334..306574,306657..307227,307305..308217,311234..312013,312077..312259,312332..312521,312598..313052))	AGAP010687-PA-like protein		with AGAP ID	1	0.000264971
785	ASIC022295	2949	KFB53855	ASIC022295 AS2_scf7180000696135 CDS join(349492..349507,349575..352507)	AGAP010680-PA-like protein		uncharacterized protein	1	0.000339098
786	ASIC022312	2982	KFB53827	ASIC022312 AS2_scf7180000696135 CDS complement(join(61049..61289,61372..61588,61661..62060,62147..62294,63445..65289,65358..65470,65553..65570))	AGAP010693-PA-like protein		with AGAP ID	1	0.000335345
787	ASIC022318	1875	KFB53874	ASIC022318 AS2_scf7180000696135 CDS join(534564..535448,535611..536600)	hypothetical protein		hypothetical protein	1	0.000533333
788	ASIC022319	462	KFB53875	ASIC022319 AS2_scf7180000696135 CDS complement(549055..549516)	hypothetical protein		hypothetical protein	1	0.0021645
789	ASIC022333	2808	KFB53888	ASIC022333 AS2_scf7180000696135 CDS complement(join(758201..758874,759485..761618))	AGAP012249-PA-like protein		with AGAP ID	1	0.000356125
790	ASIC022339	279	KFB53893	ASIC022339 AS2_scf7180000696135 CDS join(787618..787665,787729..787959)	hypothetical protein		hypothetical protein	1	0.00358423
